1  
2  
3  
4  
5  
6  
7  
8  
9  
10  
11  
12  
13  
14  
15  
16  
17  
18  
19  
20  
21  
22  
23  
24  
25

## Chronostratigraphy of Jerzmanowician. New data from Koziarnia Cave, Poland.

Małgorzata Kot<sup>1\*¶</sup>, Maciej T. Krajcarz<sup>2¶</sup>, Magdalena Moskal-del Hoyo<sup>3&</sup>, Natalia Gryczewska<sup>1&</sup>, Michał Wojenka<sup>4&</sup>, Katarzyna Pyżewicz<sup>1&</sup>, Virginie Sinet-Mathiot<sup>5&</sup>, Marcin Diakowski<sup>6&</sup>, Stanisław Fedorowicz<sup>7&</sup>, Michał Gąsiorowski<sup>2&</sup>, Adrian Marciszak<sup>8&</sup>, Paweł Mackiewicz<sup>9&</sup>

<sup>1</sup>Institute of Archaeology, University of Warsaw, Warsaw, Poland

<sup>2</sup>Institute of Geological Sciences, Polish Academy of Sciences, Warsaw, Poland

<sup>3</sup>W. Szafer Institute of Botany, Polish Academy of Sciences, Cracow, Poland

<sup>4</sup>Institute of Archaeology, Jagiellonian University, Cracow, Poland

<sup>5</sup>Department of Human Evolution, Max Planck Institute for Evolutionary Anthropology, Leipzig, Germany.

<sup>6</sup>Institute of Archaeology, University of Wrocław, Wrocław, Poland

<sup>7</sup>University of Gdańsk, Department of Geomorphology and Quaternary Geology, Institute of Geography, Gdańsk, Poland

<sup>8</sup>Department of Palaeozoology, Institute of Environmental Biology, Faculty of Biological Sciences, University of Wrocław, Wrocław, Poland

<sup>9</sup>Department of Bioinformatics and Genomics, Faculty of Biotechnology, University of Wrocław, Wrocław, Poland

\* Corresponding author; e-mail: m.kot@uw.edu.pl

¶ These authors contributed equally to this work.

& These authors also contributed equally to this work.

## Abstract

27 Lincombian-Ranisian-Jerzmanowician (LRJ) sites are sparse, and Koziarnia Cave in Poland is one of  
28 only few such sites situated at the eastern fringe of LRJ. The aim of the recent study was to obtain new  
29 chronostratigraphic data for the LRJ industries due to their extreme scarcity in Central Europe. Although  
30 the new fieldworks did not bring new *fossil directeur* such as bifacial leafpoints, a detail debitage  
31 analysis enabled identifying a presence of the ventral thinning chips in layer D, which could be identified  
32 as the LRJ assemblage-containing stratum. Besides the LRJ assemblage, strata with traces of Late  
33 Middle Palaeolithic and Early Gravettian occupation were found at the site. The radiocarbon dates of  
34 Koziarnia samples show that the archaeological settlement represent one of the oldest Gravettian stays  
35 north to Carpathians. What is more, these dates demonstrate that the cave had been alternately occupied  
36 by humans and cave bears. Additionally the radiocarbon dates indicate rather young chronology of the  
37 Jerzmanowician occupation in Koziarnia Cave (c.a. 39-36 ky cal. BP). The results confirm the  
38 possibility of long chronology of the LRJ technocomplex, exceeding the Campanian Ignimbrite event.

## Keywords:

39  
40 Cave site, Middle/Upper Palaeolithic transition, leafpoint industries, Lincombian-Ranisian-  
41 Jerzmanowician, early Gravettian,  
42

## 43 Introduction

44 Middle/Upper Palaeolithic transitional industries in Central Europe are among the most ephemeral and  
45 most debated topics in Palaeolithic discourse [1–3]. After over 100 years of research into the subject,  
46 we are still seeking for answers to crucial questions regarding, e.g. the origins [4–8], the chronology [9,  
47 10], internal divisions [11–13], or even the identification of the population responsible for these  
48 industries [14–19].

49 Lincombian-Ranisian-Jerzmanowician is one of such transitional industries determined by the presence  
50 of bifacially worked leafpoints made on blades obtained from double platform cores. Technological and  
51 experimental studies show that one is dealing here with a predetermined technique of obtaining leaf-  
52 shaped blades, which were later adjusted to a minimal extent to mirror the exact willow leaf shape  
53 through ventral thinning. Such technological features are present in transitional assemblages in southern  
54 Poland (Nietoperzowa Cave), Southern Germany (Ranis), Belgium (Spy) and the southern part of Great  
55 Britain (Beedings, Kent's Cavern), but are somewhat absent to the south of the Carpathians, where a  
56 Szeletian type of industry prevails [14, 20–23].

57 The term “Jerzmanowician” was used for the first time in 1961 by W. Chmielewski after his studies in  
58 Nietoperzowa Cave located in Jerzmanowice village [20]. Chmielewski focused his research on two  
59 cave sites, Koziarnia and Nietoperzowa, where the first bifacial leafpoints were found already in the 19<sup>th</sup>  
60 century.

61 In the second half of the 19<sup>th</sup> century, the cave sediments of several sites were exploited by local  
62 landlords to be sold as field fertiliser. The southern part of the Polish Jura, a karstic region rich in caves,  
63 was at that time the part of the Russian Empire, but the business was driven by Prussian businessmen,  
64 who organized the transit of train wagons filled with cave sediments to Prussia. In consequence, the  
65 sediments of such caves as Nietoperzowa, Koziarnia and Gorenicka were heavily destroyed. Due to the  
66 sediment exploitation, the original sediment level in Nietoperzowa Cave was lowered by around 1.5-2  
67 m, whereas in Koziarnia Cave by around 0.5-1 m. During the cave sediment exploitation, multiple  
68 prehistoric animal bones and artefacts were found. The discoveries led Ferdinand Römer, a geologist  
69 and palaeontologist from Schlesische Friedrich-Wilhelms-Universität in Breslau (now University of  
70 Wrocław), to study the cave sediments in detail. For this reason, he collected the already discovered  
71 artefacts and conducted his own excavations at several caves in the region. The various findings  
72 discovered by F. Römer [24, 25] include bifacial leafpoints from Nietoperzowa and Koziarnia caves.

73 To check their stratigraphy, Chmielewski re-excavated both caves in the 1950s. In Nietoperzowa Cave,  
74 he found three archaeological horizons (layers 4, 5a and 6), containing in total more than 87 bifacially  
75 worked leafpoints and their fragments [26]. In Koziarnia Cave, he opened ten trenches covering the area  
76 of 120 m<sup>2</sup> in total, but none of the 21 layers determined inside the cave and on the terrace in front of the  
77 cave could be clearly described as containing the Jerzmanowician assemblage. One of the layers, i.e.  
78 13, which he claimed did not contain any stone artefacts, was black in colour due to the high amount of  
79 charcoal [27]. Chmielewski called it a “cultural layer”, and by comparing it to layers 4 and 6 in  
80 Nietoperzowa Cave, he initially suggested that it was a Jerzmanowician horizon [20]. No radiometric  
81 dates were obtained at that time to confirm the hypothesis.

82 Even though the determination of the Jerzmanowician culture was based mostly on the Nietoperzowa  
83 Cave assemblage, the Koziarnia and Mamutowa caves were also included. A single radiocarbon date  
84 ( $38\ 160 \pm 1250$  BP, Gro-2181) obtained for a wood charcoal from layer 6 in Nietoperzowa Cave was  
85 presented by Chmielewski in 1961 [20], and since then it has been treated as the major chronological  
86 framework of the whole technocomplex. It was later proposed that all the assemblages containing  
87 bifacially-worked blade leafpoints from the European Plains can be merged into one category –  
88 Lincombian-Ranisian-Jerzmanowician (LRJ), a term widely used till today [28].

89 The chronology of Jerzmanowician has been restudied several times since then [14, 29, 30, 32]. The  
90 analyses were in most cases conducted on the animal fossil collection. The most recent results of  
91 multiple radiocarbon dating obtained on the basis of cave bear remains from Nietoperzowa Cave [33]

92 showed the limitation of the possible use of the old collection. The radiocarbon range of each stratum  
93 shows all the chronological spectra observed in the cave, which might indicate problems resulting from  
94 the exploration, documentation or mixing of the collection. Only a new detailed fieldwork would help  
95 to resolve all the chronological issues linked to LRJ industries.

96 In order to clarify the chronostratigraphic position of Jerzmanowician, a new fieldwork project was  
97 initiated in 2017. It aimed at the verification of the stratigraphy of Koziarnia Cave and obtaining reliable  
98 radiometric dates for a complete profile of the site, as well as reconstructing the palaeoenvironmental  
99 conditions for particular strata [34]. The paper presents the obtained chronostratigraphic data with a  
100 comparison to the results published before.

## 101 Koziarnia Cave

102 Koziarnia Cave is located in Sąszpów Valley, in the southern part of the Polish Jura (Fig 1). The cave  
103 has a 5-metre-high entrance heading SW with the main chamber covering an area of over 100 m<sup>2</sup> behind  
104 it and a single 40-metre-long gallery narrowing toward the end of the cave.

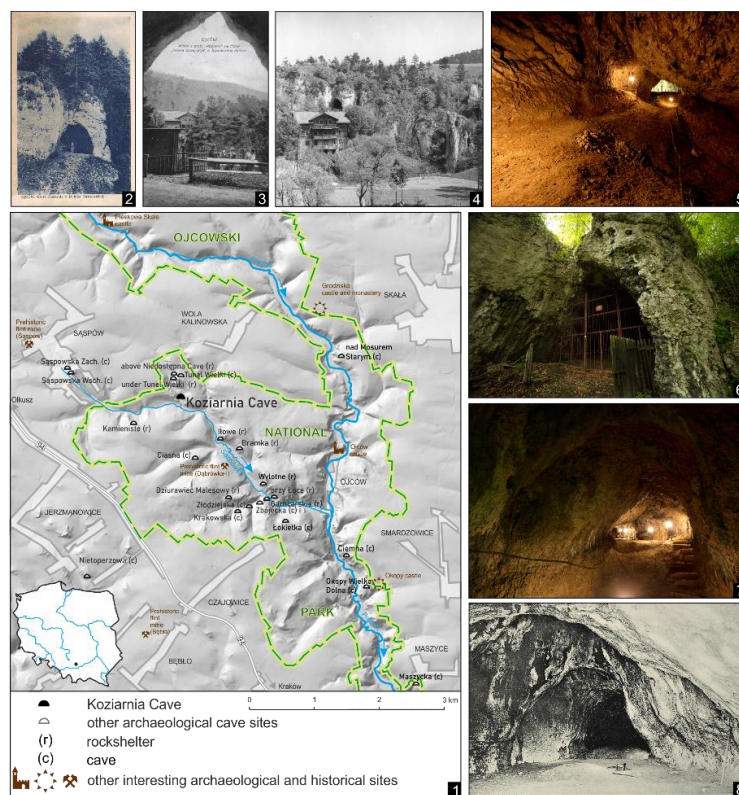

105 **Fig 1.** Koziarnia Cave, its surroundings and state of preservation. (1) Localisation of Koziarnia Cave. (2)  
106 Postcard dated to 1927 illustrating the entrance to Koziarnia Cave. (3) 1<sup>st</sup> half of the XXth century, view from  
107 the Koziarnia cave on the “Szwajcaria” hotel, situated on the opposite slope of Koziarnia Gorge. At that time a  
108 dance floor was built inside the cave. (4) Koziarnia Cave and Villa Koziarnia (previously “Szwajcaria” hotel)  
109 during excavations of prof. Chmielewski in 1958-1962 (photo from the archives of prof. T. Madeyska-  
110 Niklewska). (5-6) Koziarnia Cave during excavations in 2017. (7) Current state of preservation of Koziarnia  
111 cave sediment. The sediments inside of the cave are partly destroyed by collapsed unfilled archaeological  
112 trenches and ditches made during installation of the seismograph at the back of the cave. (8) State of preservation  
113 of Koziarnia Cave sediment in 1910. The pit visible in the middle part may be a remnant of the F. Römer  
114 fieldworks in 1879.

116  
117 The cave was continuously in use until World War I. At the beginning of the 20<sup>th</sup> century, when the  
118 sediment exploitation was halted, a dance floor was built in the main chamber, and a resting place was  
119 located on the terrace in the front of the entrance. In 1919, the cave was excavated by S. Krukowski,  
120 who at the same time conducted fieldwork in the nearby Ciemna Cave [35, 36]. Krukowski made a

121 trench in the entrance zone of the cave, finding nothing but some Holocene artefacts, which he never  
122 published. In 1958-62, the cave was excavated again by W. Chmielewski. He found most of the  
123 sediments in the main chamber already destroyed due to the previous activities. Inside the cave,  
124 undisturbed layers were found as far as 20 m from the cave entrance. In his final publication,  
125 Chmielewski described the cross-section as having 21 separate geological layers [27]. Several of them  
126 contained flint artefacts. Originally, Chmielewski distinguished eight cultural layers (4, 7, 10, 13, 16B,  
127 17, 18, 20), out of which layers 4, 7, 10 and 13 contained only charcoal and no lithic artefacts.

128 Lithic artefacts were found only in the lower layers. Middle Palaeolithic settlement was associated with  
129 layers 17, 18 and 20. The small assemblage contains two bifacial backed knives, several flake discoid  
130 cores and post-depositionally damaged debitage. Rare stone artefacts also described as Middle  
131 Palaeolithic were found in layers 15 and 16. One of the artefacts found in layer 15 (mistakenly published  
132 as coming from layer 17) is a massive blade made on a double platform core with multiple post-  
133 depositional retouches (Fig 7, IX/17-23/61). The archaeologically sterile layer 13 was described as black  
134 due to high charcoal concentration. The concentration of charcoal was very high in the main corridor  
135 (20–35 metres from the entrance). The upper part of the section was present only to a minimal extent in  
136 the trenches located farther from the entrance. Chmielewski correlated them with the loess sequences  
137 found in the front of the cave and dated to MIS 2.

138 Unfortunately, the trenches were not refilled after the excavations, and they have stayed open for 70  
139 years. All the walls disintegrated slowly causing massive damage (Fig 1.7).

## 140 Methods & Materials

141 The new fieldwork conducted in 2017 covered 2.85 m<sup>2</sup> (Fig 2). A trench was opened 40 metres from the  
142 cave entrance in the NW corner of Chmielewski's trench IX in order to correlate the stratigraphy and  
143 open a section in the place that could cover the highest possibly undisturbed profile. The collapsed walls  
144 of the old trenches containing a mixed sediment were visible during the fieldwork. One should still take  
145 into consideration that even the stratified parts of the trench might be post-depositionally moved due to  
146 the slight trench wall movements. The *in situ* sediment was collected and wet sieved in whole with 1  
147 mm sieves. A mixed sediment was collected and wet sieved with 3 mm sieves. The sieved material was  
148 dried and screened in order to collect tiny microfaunal, anthracological and archaeological material. All  
149 the *in situ* findings, including the charcoal, were 3D measured.

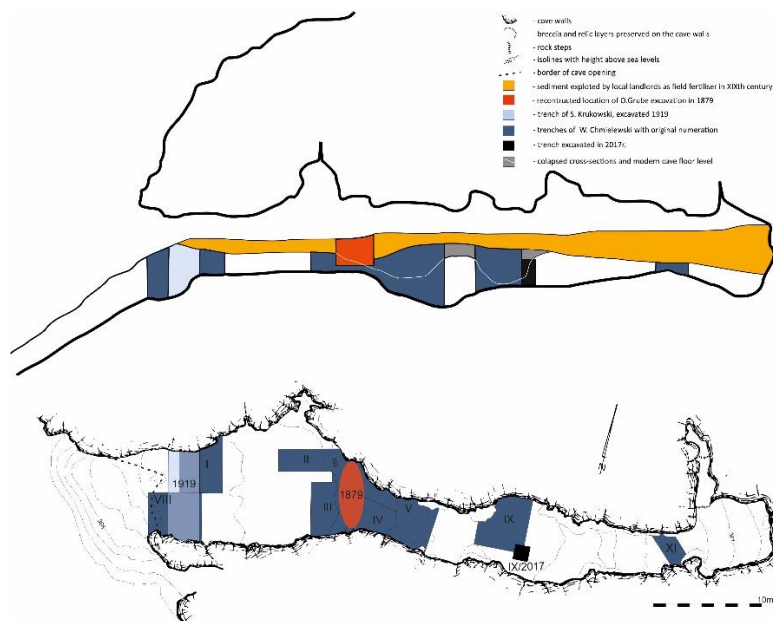

150

151 **Fig 2.** Plan and the cross-section of Koziarnia Cave with the localisation of all previous archaeological  
152 fieldworks.



153

154 Additionally, the old collection of artefacts found in Koziarnia by F. Römer in 1879 was restudied. For  
 155 the purpose of chronostratigraphic studies, two unpublished bone tools were radiocarbon dated and  
 156 analysed through zooarchaeology by mass spectrometry (ZooMS) and traseology.

## 157 Radiocarbon dating

158 In each layer, charcoal was the dominated material (Table 1). Each charcoal fragment was taxonomically  
 159 identified on the basis of wood anatomy atlases [37, 38] and the modern wood collections of the  
 160 Department of Palaeobotany of the W. Szafer Institute of Botany of the Polish Academy of Sciences.  
 161 Only identified fragments were dated. The selection of the most suitable charcoal fragments is based on  
 162 a list of woody flora typical of the environmental conditions for a specific period, as well as the size and  
 163 ring curvature indicating the origins of the wood from a branch or a trunk in order to avoid the old wood  
 164 problem [39, 40]. For MIS 3, it is more adequate to select taxa representing coniferous wood better  
 165 adapted to the colder conditions of the Pleistocene in Central Europe [41–45]. When no charcoal  
 166 fragments were available from a chosen stratum, animal fossils were used for dating. Due to the  
 167 proximity to the edge of the old trenches and possible contamination of the sediment, only samples  
 168 collected in the farthest part from the edge of the old trench were used.

169

170 **Table 1** Radiocarbon dates from Koziarnia cave.

| date code  | sample inv. No | dated material   | species                           | trench  | original layer      | final layer | C14 date (uncalibrated) | C:N ratio in bone collagen | comments  |
|------------|----------------|------------------|-----------------------------------|---------|---------------------|-------------|-------------------------|----------------------------|-----------|
| OxA-39509  | MMW/26<br>61.4 | bone tool        | <i>Elephantidae</i>               | ?/1879  | ?                   | ?           | 22020 ± 150 BP          | -                          |           |
| OxA-39539  | MMW/26<br>61.5 | bone tool        | <i>Elephantidae</i>               | ?/1879  | ?                   | ?           | 20870 ± 210 BP          | -                          |           |
| Poz-82394  | -              | bone             | <i>Ursus arctos priscus</i>       | ?/1879  | ?                   | ?           | 39200 ± 1100BP          | 2.94                       | 8.4% coll |
| Poz-119319 | KOZ_IX_4_5     | bone/man dible   | <i>Ursus ingressus</i>            | IX/1961 | 4/5                 | 3-5         | 25440 ± 210 BP          | 3.08                       |           |
| Poz-119320 | KOZ_IV_2       | bone/skul 1      | <i>Ursus ingressus</i>            | IV/1960 | 2a                  | 9-11        | 27340 ± 260 BP          | 3.08                       |           |
| GdA-3898   | Koz-04-12      | tooth/M2         | <i>Ursus ingressus</i>            | IX/1961 | 12?                 | 10?         | 32440 ± 240 BP          | 3.5                        |           |
| Poz-98895  | C9             | charcoal         | <i>Picea abies/Larix decidua</i>  | IX/2017 | K                   | 12          | 28090 ± 360 BP          | -                          | 0.3 mgC   |
| Poz-98898  | C52            | charcoal         | <i>Pinus sp.</i>                  | IX/2017 | K'                  | 13          | 30330 ± 500 BP          | -                          | 0.2 mgC   |
| Poz-99773  | B68            | tooth/I          | <i>Ursus ingressus</i>            | IX/2017 | D                   | 15          | 37650 ± 900 BP          | 3.19                       | 1.9% coll |
| Poz-99816  | B254           | tooth/M1         | <i>Ursus ingressus</i>            | IX/2017 | D                   | 15          | 39000 ± 1000 BP         | 3.17                       | 4.0% coll |
| Poz-110657 | C102           | charcoal         | <i>Pinus type sylvestris-mugo</i> | IX/2017 | F                   | 16b         | 33100 ± 1200 BP         | -                          | 0.14 mgC  |
| GdA-3896   | Koz-01-7       | tooth/I3         | <i>Ursus ingressus</i>            | IV/1960 | 7                   | 15-16       | 39340 ± 430 BP          | 2.8                        |           |
| Poz-98901  | C101           | charcoal         | <i>Pinus type sylvestris-mugo</i> | IX/2017 | H'-cleaning section | 17          | 33230 ± 480 BP          | -                          | 0.8 mgC   |
| Poz-99815  | B165           | tooth            | <i>Ursus ingressus</i>            | IX/2017 | H'                  | 17          | 40100 ± 1100 BP         | 3.17                       | 4.3% coll |
| Poz-99814  | B160           | bone/met apodium | <i>Ursus ingressus</i>            | IX/2017 | H'                  | 17          | >45000 BP               | 3.19                       | 4.5% coll |

|            |               |                 |                                   |         |        |       |                   |                           |                                  |
|------------|---------------|-----------------|-----------------------------------|---------|--------|-------|-------------------|---------------------------|----------------------------------|
| Poz-116687 | B200          | tooth           | <i>Ursus ingressus</i>            | IX/2017 | I      | 17    | 40600 ± 1200 BP   | 3.13                      |                                  |
| GdA-3897   | Koz-02-10_10a | bone/metapodium | <i>Ursus ingressus</i>            | V/1960  | 10-10a | 19-20 | 24190 ± 120 BP    | 3.1                       |                                  |
| Poz-99806  | B125          | bone/phalange   | <i>Ursus ingressus</i>            | IX/2017 | F      | 16b   | 26160 ± 180 BP    | too low collagen quantity | 0.3% coll, 0.9 mgC               |
| Poz-98896  | C26           | charcoal        | <i>Picea abies/Larix decidua</i>  | IX/2017 | F      | 16b   | 29430 ± 720 BP    | -                         | 0.13 mgC; incorrectly carbonised |
| Poz-98425  | C63           | charcoal        | <i>Pinus type sylvestris-mugo</i> | IX/2017 | D      | 15    | 220 ± 30 BP       | -                         |                                  |
| Poz-98902  | C99           | charcoal        | <i>Juniperus communis</i>         | IX/2017 | E      | 16a   | 145 ± 30 BP       | -                         |                                  |
| Poz-98899  | C56           | charcoal        | <i>Pinus type sylvestris-mugo</i> | IX/2017 | L/M    | 19-21 | 140.23 ± 0.37 pMC |                           | 0.7 mgC                          |
| Poz-98900  | C57           | charcoal        | <i>Pinus type sylvestris-mugo</i> | IX/2017 | M      | 21    | 175 ± 30 BP       |                           | 0.6 mgC                          |

171

172 Charcoal, bones, teeth and ivory were dated with the AMS radiocarbon method in the Poznań  
 173 Radiocarbon Laboratory (Poland), the Oxford Radiocarbon Unit (UK) and the Gliwice Absolute Dating  
 174 Methods Centre (Poland). In the case of bone, teeth and ivory artefacts, the dated fraction was collagen,  
 175 and in the case of charcoal, it was cellulose. Collagen and cellulose extraction and purification followed  
 176 widely accepted methodology [46, 47].

177 The obtained radiocarbon ages were calibrated versus the INTCAL'13 radiocarbon atmospheric  
 178 calibration curve [48], using the software OxCal ver. 4.3.2 [49-51]. All calibrated dates are presented in  
 179 calibrated years BP with 95.4% probability range.

## 180 Thermoluminescence dating

181 Additionally, the bottom-most layer of silty loams was dated with the use of thermoluminescence (TL)  
 182 dating in the Department of Geomorphology and Quaternary Geology of the University of Gdańsk. The  
 183 deposit moisture was measured in each sample. After drying, the dose rate ( $d_r$ ) was determined with the  
 184 use of the MAZAR gamma spectrometer. The concentrations of  $^{226}\text{Ra}$ ,  $^{232}\text{Th}$ ,  $^{40}\text{K}$  (Table 2) in each  
 185 sample were obtained from twenty measurements lasting 2000 s each. Equivalent dose (ED) was  
 186 established on the 63e80 mm polymineral fraction, after 10% HCl and 30%  $\text{H}_2\text{O}_2$  washing and UV  
 187 optical treatment. The samples were irradiated with 20 Gy, 30 Gy, 40 Gy, 50 Gy and 100 Gy, doses  
 188 from  $^{60}\text{Co}$  gamma source. Before measurement, the samples were heated at 140°C for 3 hours. A sample  
 189 pre-treated in this way was used to determine the equivalent dose (ED) (Table 2) by the TL multiple-  
 190 aliquot regenerative technique [52], according to the description published by Fedorowicz et al. [53].  
 191 The registration of curves was performed on RA'94 (Mikrolab) thermoluminescence reader, coupled  
 192 with EMI 9789 QA photomultiplier. The TL age was calculated according to Frechen [54]. A detailed  
 193 description of the preparation and the equipment used in the study is contained in the paper by  
 194 Fedorowicz et al. [53].

195

196 **Table 2.** Thermoluminescence dating of a soil sample from Koziarnia, layer M.

| Sample  | Lab. No. | $^{226}\text{Ra}$<br>[Bq / kg] | $^{232}\text{Th}$<br>[Bq/kg] | $^{40}\text{K}$<br>[Bq / kg] | Dose rate $d_r$<br>[Gy / ka] | Equivalent dose/ ED (Gy) | TL age [ka] |
|---------|----------|--------------------------------|------------------------------|------------------------------|------------------------------|--------------------------|-------------|
| layer M | UG-7096  | 13.3±1.4                       | 38.5±3.5                     | 366±37                       | 2.38±0.24                    | 29.0±3.8                 | 12.1±1.8    |

197

## 198 U-series dating

199 Due to the presence of radiocarbon dates reaching the limit of the method range, the U/Th method was  
200 additionally applied (Table 3). The chemical procedure was done in the U-series Laboratory of the  
201 Institute of Geological Sciences, Polish Academy of Sciences (Warsaw, Poland). The method included  
202 the thermal decomposition of organic matter and adding the  $^{233}\text{U}$ - $^{236}\text{U}$ - $^{229}\text{Th}$  spike to the samples, which  
203 were then dissolved in nitric acid. Uranium and thorium were separated from the hydroxyapatite matrix  
204 using the chromatographic method with TRU-resin [55]. The isotopic composition of U and Th was  
205 measured in the Institute of Geology of the Czech Academy of Sciences, v. v. i. (Prague, Czech  
206 Republic), with a double-focusing sector-field ICP mass analyzer (Element 2, Thermo Finnigan MAT).  
207 The instrument was operated at low mass resolution ( $m/\Delta m \geq 300$ ). The measurement results were  
208 corrected to include background and chemical blank in the calculations. The age errors were calculated  
209 considering all uncertainties, except decay constant, using error propagation rules. Two cave bear teeth  
210 were dated and cross-checked with the use of radiocarbon method. All cave bear remains were assigned  
211 to *Ursus ingressus* according to preliminary analyses of ancient DNA as well as previous studies, which  
212 indicated that only this species (not *U. spelaeus*) was present on the territory of Poland in the Pleistocene  
213 [56–59].

214

215 **Table 3.** Uranium datings of *Ursus ingressus* teeth samples from Koziarnia. The reported errors are 2 standard  
216 deviations.

| Sample | layer | Lab. no. | U cont. [ppm] | U-234/U-238 | Th-230/U-234 | Th-230/Th-232 | Age [ka] |
|--------|-------|----------|---------------|-------------|--------------|---------------|----------|
| B 129  | F     | 1124     | 0.0331±0.0002 | 1.14±0.01   |              |               |          |
| B 142  | G     | 1125     | 0.0056±0.0001 | 1.19±0.01   |              |               |          |
| B 152  | G     | 1126     | 0.0275±0.0001 | 1.22±0.06   | 0.200±0.009  | 86±4          | 24.3±1.3 |
| B 200* | I     | 1127     | 0.0458±0.0002 | 1.16±0.06   | 0.209±0.007  | 55±2          | 25.6±1.0 |
| B 247  | L     | 1128     | 0.0407±0.0002 | 1.27±0.08   |              |               |          |

217 \*Sample dated also with  $^{14}\text{C}$  method (Table 1).

218

## 219 Techno-typological analyses

220 The archaeological assemblage was analysed with the use of a geometric, morphometric and  
221 technological approach. A set consisting of 33 features was determined for each of the pieces of  
222 debitage. The attributes were divided into four general groups:

- 223 • general artefact morphology (the size, shape, state of preservation/fragmentation, symmetry,  
224 cross-section, profile, the character of the distal part),
- 225 • the condition of the dorsal side (the direction of the scars, cortex, interscar ridges, erasing chips,  
226 retouch),
- 227 • the condition of the ventral side (the bulbs, bulbar scars),
- 228 • the condition of the butt (the size, shape, profile, preparation).

229 In order to determine the characteristic features of the Jerzmanowician debitage, experimental studies  
230 were conducted additionally. They aimed at reproducing the bifacially-worked leafpoints and studying  
231 them to determine whether one can distinguish any specific features indicating leafpoint-shaping based  
232 on the morphology of the debitage. During the experimental session, two blades and two flakes were  
233 shaped by experimental knapper Miguel Biard into leafpoints, and the geometric morphometric features  
234 of the debitage were analysed.

## 235 **Traseology**

236 Flint artefacts designated for traseological analysis were subjected to a cleaning procedure involving the  
237 use of warm water and acetone. The flint material was analysed using a Nikon LV150 metallographic  
238 microscope and a Keyence VH-Z100R digital microscope. The microscopic analyses were conducted  
239 using with a 50x to 400x magnification ratio. The noted macroscopic and microscopic traces – chipping,  
240 linear wear patterns and signs of usewear, linked to changes in the surfaces caused by post-depositional  
241 and utility factors. The listed traces were interpreted based on a comparison with an experimental  
242 reference database, kept together with the relevant documentation at the Institute of Archaeology of the  
243 University of Warsaw , as well as with reference to the appropriate literature.

244 The surfaces of the bone items selected for traseological analyses were cleaned using acetone. The  
245 optical-stereoscopic Olympus SZX9 and metallographic Nikon Eclipse LV 100 microscopes were used  
246 for the observation of the traces, along with the Nikon Shuttlepix digital microscope with a 6.3x to 100x  
247 magnification ratio. Natural and technological traces, as well as evidence of usewear were noted on the  
248 analysed material.

## 249 **ZooMS**

250 The ZooMS (peptide mass fingerprinting) analysis followed protocols detailed elsewhere [60-62]. Both  
251 bone tools (KZ-2661.4 and KZ-2661.5) were sampled destructively (between 10-30 mg) and each bone  
252 sample was demineralised in 250 µl 0.5 M hydrochloric acid (HCL) at 4°C for 20 h. The samples were  
253 then centrifuged for 1 min at 10k rpm and the supernatant was removed. The demineralized collagen  
254 was then rinsed three times in 200 µl of 50 mM AmBic (ammonium bicarbonate) and 100 µl of 50 mM  
255 Ambic was added to each sample. Next, the samples were incubated at 65°C for 1 h. Afterwards, 50 µl  
256 of the resulting supernatant was digested with trypsin (Promega) at 37°C overnight, acidified using 1 µl  
257 of 20% TFA, and cleaned with C18 ZipTips (Thermo Scientific).

258 Digested peptides were spotted in triplicate on a MALDI Bruker plate with the addition of an  $\alpha$ -Cyano-  
259 4-hydroxycinnamic acid matrix. MALDI-TOF-MS analysis was conducted at the Fraunhofer IZI in  
260 Leipzig (Germany), using an autoflex speed LRF MALDI-TOF (Bruker) in reflector mode, positive  
261 polarity, matrix suppression of 590 Da and collected in the mass-to-range 700-3500 m/z.

262 Triplicates were merged for each sample and taxonomic identifications were made through peptide  
263 marker mass identification in comparison to a database of peptide marker series (A-G) for all medium-  
264 to-larger sized mammalian species [62-64].

265

## 266 **Results**

### 267 **Stratigraphy**

268 The new fieldwork confirmed the massive destruction of the top part of the original sedimentary  
269 sequence. The topmost layer in the recent cross section, which can undoubtedly be correlated with the  
270 previous fieldwork, is layer K. It can be correlated with Chmielewski's layer 12. There is no possibility  
271 to correlate the overlying strata J, B and A, as long as their remnants can be seen only close to the cave  
272 walls. All the overlying layers have already been destroyed, mostly due to 19<sup>th</sup>-century cave sediment  
273 exploitation.

274 In general, the sedimentary sequence can be divided into four lithostratigraphic series. The lowermost  
275 series is red residual clay of weathering origin (P), which has been locally preserved, a remnant of the  
276 older sedimentary series (S1). It fills the cracks and fissures in the bedrock. The second series consists  
277 of silt and sand (layer M), filling the bottom erosional rill, most probably a vadose canyon. The third  
278 series is built of red-brown and brownish loams (layers H', I, H, I' and L), containing highly corroded  
279 and rounded limestone clasts (Fig 3). The upper series consists of a set of grey loams containing either  
280 corroded or sharp-edged limestone clasts. It is divided into two parts by a lamina of red-brown clay  
281 (layer C). Layer K', due to considerable amounts of charcoal, was a very dark black colour in



282 Chmielewski's trenches. In our trench, 40 m from the entrance, this layer still contains large charcoal  
283 fragments but it is more yellowish-dark grey in colour. The uppermost part of the section, especially  
284 strata situated above layer K', has been disturbed. Layers younger than layer K are preserved only as  
285 remnants attached to the wall.

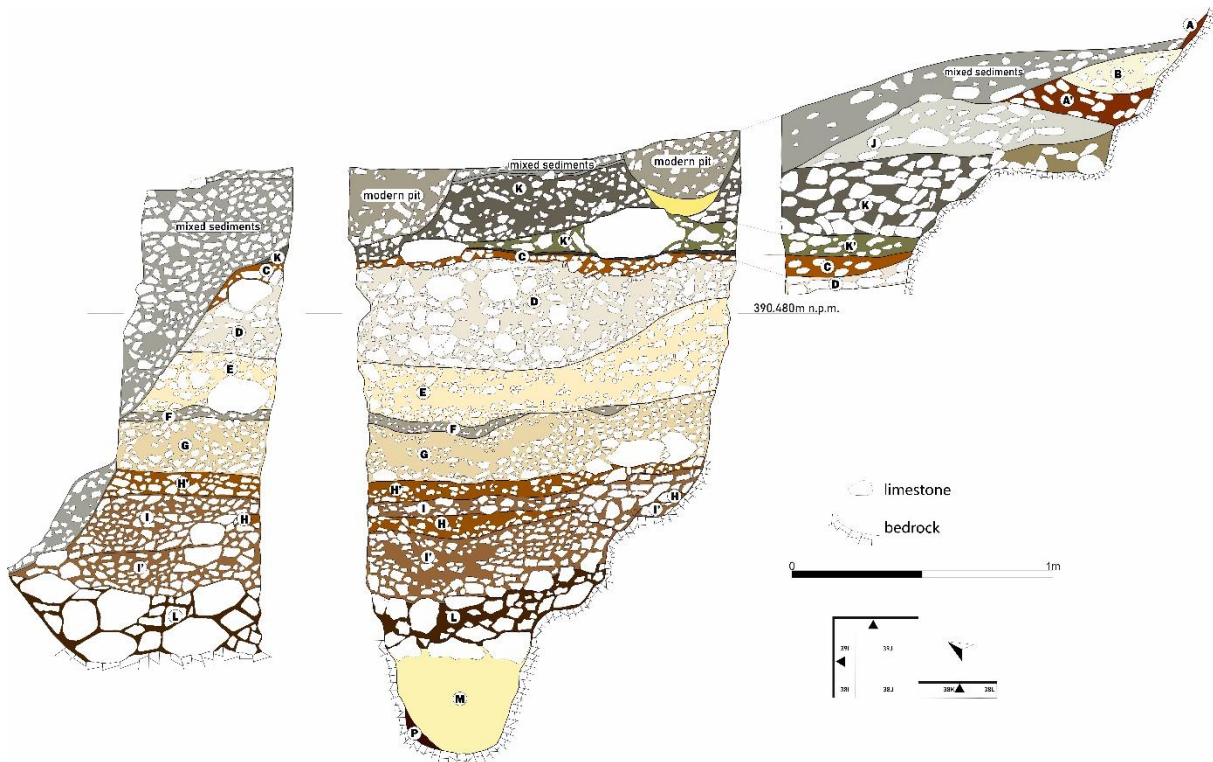

286  
287 **Fig 3.** Northern and eastern cross-section of trench IX/2017 excavated in 2017 and located in the corner of the  
288 trench IX by W. Chmielewski (drawn by K. Skiba).

289  
290 Several erosional surfaces can be identified within the sequence. The most prominent are situated at the  
291 bottom of layers I, E and D. They are marked as non-conformities. The most distinct is the bottom of  
292 layer I, which form erosional channels cutting into at least two of the lower layers H and I'.

293

## 294 Chronology

295 In total, 14 animal bones and 9 charcoal fragments from the new excavations have been dated (Table 1).  
296 Radiocarbon dating was conducted on cave bear bones from the old Chmielewski excavations.  
297 Additionally, the date was estimated for two bone tools and the single cave bear bone from Römer's  
298 collection (Fig 4).

OxCal v4.3.2 Bronk Ramsey (2017); r:5 IntCal13 atmospheric curve (Reimer et al. 2013)

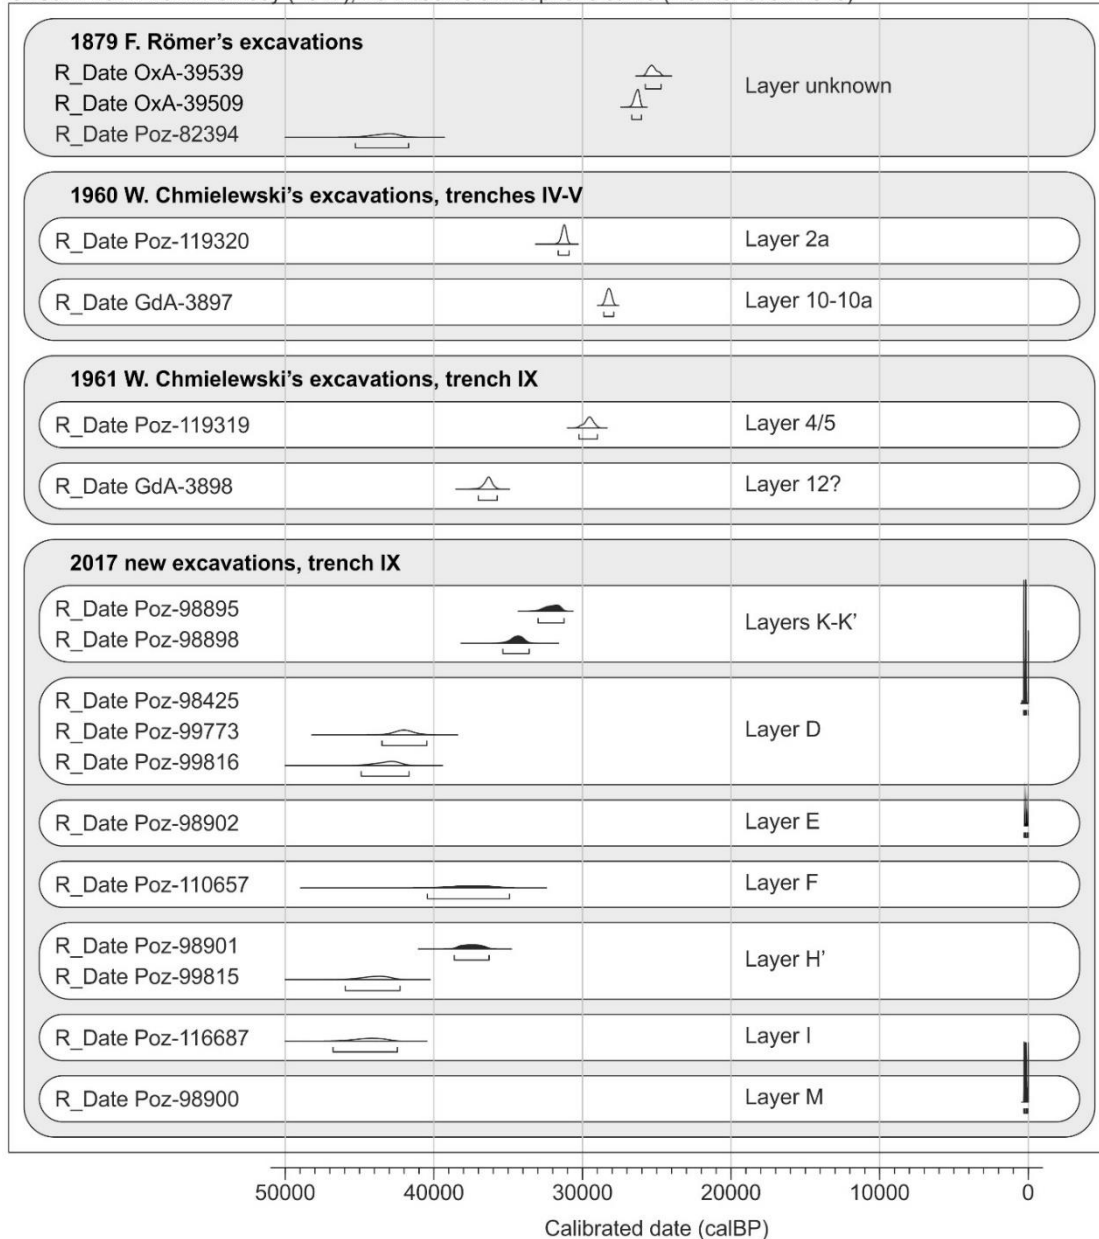

299

300 **Fig 4.** Calibrated radiocarbon dates from Koziarnia Cave arranged by layers. In black – the dates established for  
 301 charcoal fragments, in white – for bones or teeth. The recent date Poz-98899, which falls beyond the IntCal13  
 302 calibration curve, is not shown, similarly to the open date Poz-99814.

303

304 The results show that at least some of the strata were contaminated by recent material. Recent dates were  
 305 obtained solely for the charcoal fragments. This may indicate post-depositional processes connected  
 306 with the extended exposition of the old open trench walls to external conditions.

307 Two bones were dated with the use of U-series (Table 3). In order to check the results, one of the bone  
 308 specimens was dated with both the radiocarbon and U-series method. The U-series date is distant from  
 309 the radiocarbon one (Table 1). This suggests that U-series dating is probably unreliable at this site. The  
 310 reason behind this might be the open uranium system, i.e., the constant availability of uranium ions in  
 311 the ambient sediments, which resulted in the continuous uptake of U from the environment by bone. In  
 312 such cases, the U-series dates have only a *terminus ante quem* significance.

313 Among the newly established dates for the bones, 10 exhibit the atomic C:N ratio in extracted collagen  
 314 which stays within the accepted range of 2.9-3.6 [65, 66] and indicates well-preserved collagen. One  
 315 sample (date Poz-99806) yielded too low amount of collagen to measure the C:N ratio, while another  
 316 (date GdA-3896) exhibited too low C:N ratio; therefore, we decided to discard these dates (Table 1).

317 The lowermost layers L-M yielded two radiocarbon dates. One of them represents recent contamination,  
 318 the other was established based on material coming from the 1960s excavation; thus, we are not certain  
 319 about its provenience. On the basis of the dating of the upper layers, layers L-M should be regarded as  
 320 older than ca. 47 ky cal. BP. The TL date for layer M is incompatible with radiocarbon dating. This date  
 321 could be biased due to the close proximity of bedrock, which resulted in a different radiation dose  
 322 actually absorbed by the sediment than the dose assumed in the laboratory from the measurement of the  
 323 concentration of radionuclides within the sample.

324 The complex of layers H'/I/H/I' (H' and I, including also the undated layers H and I') exhibits a  
 325 radiocarbon age of around 47-36 ky cal. BP. The overlying layer F (layer G was not dated) show a  
 326 slightly younger age, of around 40-35 ky cal. BP. This chronology is based only on one date with a large  
 327 margin of error (1200 years for 1σ, almost 2500 years for 2σ). The upper part of the sequence yielded  
 328 dates which were not in chronological order with the lower ones. Material from layer D is as old as the  
 329 material from the layer F and complexes of layers H'/I/H/I'. This indicates the erosion of material from  
 330 the lower stratigraphic position and its re-deposition into layer D. The huge channel-like structure visible  
 331 in the bottom of layer D supports this hypothesis. Layers K and K' provided dates of around 35-31 ky  
 332 cal. BP. This remains in accordance with the dating of layer F, especially if we consider the large margin  
 333 of error for a single date from these layers. This also indicates that the erosion event followed by the re-  
 334 deposition of layer D should be dated to around 37 ky cal. BP.

### 335 **Archaeological assemblage**

336 During new fieldwork, over 1000 stone artefacts were collected. Table 4 shows the composition of  
 337 artefacts found in each geological stratum. As a result of the opening of a new trench in the corner of  
 338 the old collapsed trench and excavating not only *in situ* sediments, but also partly collapsed and moved  
 339 layers, not all artefacts could be undoubtedly attributed to one level (Table 4). Within the majority of  
 340 layers, the number of collected lithics has not exceeded 20 pieces each. Excluding mixed materials, only  
 341 layers D, H' and I' are relatively richer.

342

343 **Table 4.** General composition of the Koziarnia Cave assemblage.

| Layer | No of lithics artefacts | Average size (mm) | flakes (%) | blades (%) | chips (and termic chips) (%) | chunks (%) | chips and chunks | pieces with cortex | tools/flakes with genuine retouch (%) | postdepositional retouch on artifacts (%) | pieces broken postdepositional or undeterminably | pieces with postdepositional retouch or breakage, edge abrasion |
|-------|-------------------------|-------------------|------------|------------|------------------------------|------------|------------------|--------------------|---------------------------------------|-------------------------------------------|--------------------------------------------------|-----------------------------------------------------------------|
| A     | 5                       | 6.5x5.2x2.2       | 0          | 0          | 2                            | 3          | 5                | 2                  | 0                                     | 0                                         | 0                                                | 0                                                               |
| J     | 5                       | 7.3x5.3x1.8       | 2          | 0          | 0                            | 3          | 3                | 0                  | 1                                     | 0                                         | 2                                                | 3                                                               |
| K+K'  | 139                     | 8x7.6x2.5         | 44 (31.7%) | 9 (6.5%)   | 33 (23.7%)                   | 53 (38.1%) | 86 (61.9%)       | 38 (27.3%)         | 11 (8.4%)                             | 13 (9.4%)                                 | 40 (28.8%)                                       | 73                                                              |
| C     | 7                       | 6.7x5.4x2.9       | 2          | 0          | 3                            | 2          | 5                | 1                  | 0                                     | 2                                         | 2                                                | 4                                                               |

|                       |     |                 |                    |                  |                    |                    |                    |                    |                  |               |                |     |
|-----------------------|-----|-----------------|--------------------|------------------|--------------------|--------------------|--------------------|--------------------|------------------|---------------|----------------|-----|
| <b>D</b>              | 126 | 7.5x6x<br>2.3   | 35 (28<br>%)       | 2<br>(1.6%)      | 44<br>(35.2<br>%)  | 43<br>(34.4<br>%)  | 87<br>(69.6<br>%)  | 24<br>(19.2<br>%)  | 2<br>(1.6%)      | 19<br>(15.2%) | 31<br>(24.8%)  | 69  |
| <b>E</b>              | 6   | 5x5.6x<br>2     | 2                  | 0                | 2                  | 2                  | 4                  | 0                  | 0                | 1             | 3              | 4   |
| <b>F</b>              | 1   | 17x11x<br>7     | 0                  | 0                | 0                  | 1                  | 1                  | 0                  | 0                | 1             | 0              | 1   |
| <b>G</b>              | 14  | 10x7.9<br>x3.4  | 2<br>(14.3<br>%)   | 1<br>(7.1%)      | 0 (0%)             | 11<br>(78.6<br>%)  | 11<br>(78.6<br>%)  | 2<br>(14.3<br>%)   | 0 (0%)           | 1<br>(7.1%)   | 3<br>(21.4%)   | 5   |
| <b>H/H<br/>'/I/I'</b> | 435 | 9.3x7.9<br>x3.5 | 104<br>(23.9<br>%) | 3<br>(0.68<br>%) | 130<br>(29.9<br>%) | 196<br>(45.1<br>%) | 326<br>(74.9<br>%) | 104<br>(23.9<br>%) | 5 (1.1<br>%)     | 60<br>(13.8%) | 133<br>(30.6%) | 108 |
| <b>L</b>              | 18  | 11x8.5<br>x5    | 8<br>(44.4<br>%)   | 0 (0%)           | 3<br>(16.7<br>%)   | 7<br>(38.9<br>%)   | 10<br>(55.6<br>%)  | 4<br>(22.2<br>%)   | 2<br>(11.1%<br>) | 1<br>(5.6%)   | 4<br>(22.2%)   | 9   |
| <b>M</b>              | 8   | 6.2x6.4<br>x2.6 | 1                  | 0                | 4                  | 3                  | 7                  | 3                  | 1                | 0             | 0              | 2   |

344

345 Most of the artefacts are tiny chips and chunks; on average, these constitute 69% of the assemblage. The  
 346 average stone artefact size is 7.36 mm in length, 5.85 mm in width, and 2.65 mm thick. No cores or  
 347 preforms were found within the assemblage. The small size of the artefacts can be explained by the  
 348 location of the trench, which was situated 40 m from the entrance to the cave. One can expect scarce  
 349 human activities to have been held so far from the entrance and the only source of sunlight.

350 Overall, 27% of all the flint artefacts had post-depositional retouches, and 35% of them had undergone  
 351 post-depositional breakage. The highest impact of post-depositional processes was observed in layers I  
 352 and I'. The state of preservation and small dimensions of the artefacts had a significant influence on  
 353 further analyses. These factors made it significantly more difficult to identify any potential traces formed  
 354 as a result of the use of individual flint specimens. The surfaces had been deformed to a high extent and  
 355 covered with shiny or white patina. In addition, some parts of the edges had been destroyed, an effect  
 356 of which were numerous post-depositional chippings, which stand out due to the distinctive "freshness"  
 357 of the flake negatives as compared to the state of preservation of the remaining parts of the specimen  
 358 surfaces.

359 Apart from layers K/K', where several characteristic retouched pieces attributed to Gravettian were  
 360 found, the other layers contained only uncharacteristic debitage, prevalently chips. To determine in  
 361 which layer one could expect the Jerzmanowician occupation, analysis of the chips was required.

362 The general assumption was that in the Jerzmanowician assemblage, due to the characteristic retouching  
 363 of the blades to shape a leafpoint, one could expect specific debitage, derived at the stage of the ventral  
 364 thinning. Unlike in Middle Palaeolithic and Gravettian, we assumed that in the Jerzmanowician  
 365 assemblage, one would be able to find chips and flakes with remnants of the ventral surface of the  
 366 original blank/blade.

367 To test this assumption, we conducted experimental knapping and analysed the debitage obtained during  
 368 the blade leafpoint shaping (Fig 5).



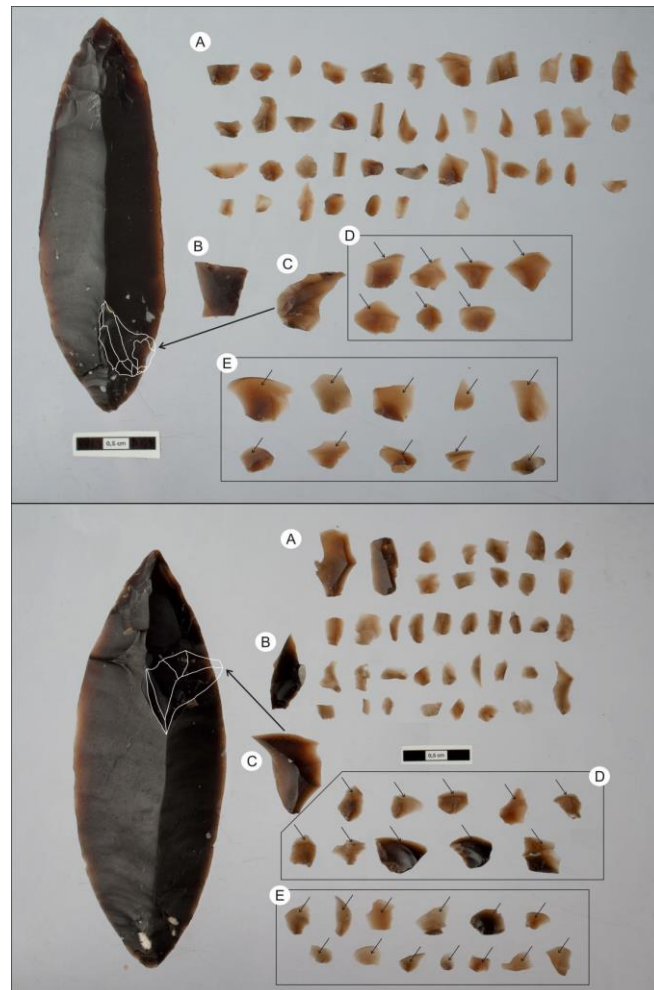

369

370 **Fig 5.** Results of experimental knapping, Jerzmanowician point and selected debitage products, (A) chips made  
371 during leafpoint production with ordinary morphology. (B) chip or flake detached during ventral thinning, near  
372 the leafpoint base. (C) chip/ flake curved due to reaching the transversal interridge of the original blank in its  
373 distal part. (D) The second generation of ventral thinning chips with remnants of ventral surface of the blank in  
374 their distal parts. (E) The first generation of ventral thinning chips with the ventral surface of the blank on their  
375 entire dorsal side.

376

### 377 **Small debitage: experiments**

378 Experimental studies show that during the shaping of a blade into a leafpoint, approximately 150 chips  
379 over 2 mm in length are produced. Only several pieces had dimensions exceeding 1.5 cm and could be  
380 ascribed as small flakes. Chips are prevalent among the debitage. The chips can be divided into three  
381 general morphological groups.

382 The first group consists of ventral thinning chips (Fig 5E). They contain the remnants of the ventral  
383 surface of the blank on their dorsal side. They come from the initial thinning of the ventral side of the  
384 blade and can be described as the first generation of ventral thinning.

385 The second group contains chips which are slightly bent, with a width/length index of  $>1$ . On their dorsal  
386 side, they contain scars of even smaller removals in their proximal part and a big ventral scar on their  
387 distal part. Such chips come from second generation of ventral thinning (Fig 5D). Unfortunately, due to  
388 the small sizes of the analysed artefacts, in many cases, it is not possible to say if the remnant of the flat  
389 surface in the distal part of the artefacts is the ventral or dorsal side of the original blank.

390 The third group of chips consists of undeterminable uncharacteristic small chips (Fig 5A). They mostly  
391 come from dorsal thinning and shaping, as well as secondary ventral thinning. The characteristic feature

392 in shaping a leafpoint out of the wide and rather thick blade is the presence of dorsal thinning chips,  
 393 which reach the interscar ridge or the blank and contain remnants of such a ridge running transversally  
 394 to their main axis (Fig 5C). Such flakes might be considered the specific debitage of leafpoint shaping.

395 Additionally, during ventral thinning near the butt part of the blade, in some cases a bigger chunk is  
 396 produced, which aims to prepare the correct angle for further removals (Fig 5B).

397 Based on experimental studies, one can assume that only the presence of chips from the first generation  
 398 of ventral thinning can be treated as evidence for ventral thinning, and – therefore – can be associated  
 399 with leafpoint shaping. Although the presence of only the second generation's chips cannot be indication  
 400 for leafpoint production, their appearance together with first generation chips could provide additional  
 401 support for such an assumption.

402 Table 5 presents morphological analysis of the chips found in distinct strata in Koziarnia. The results  
 403 show that ventral thinning chips could only be found in layer D (Fig 6) and in the disturbed sediments  
 404 (n=28). In other layers, the undeterminable chips of the third type prevail. The presence of ventral  
 405 thinning chips leads to the assumption that layer D should be associated with an assemblage that used a  
 406 ventral thinning method, probably bifacial leafpoint shaping.

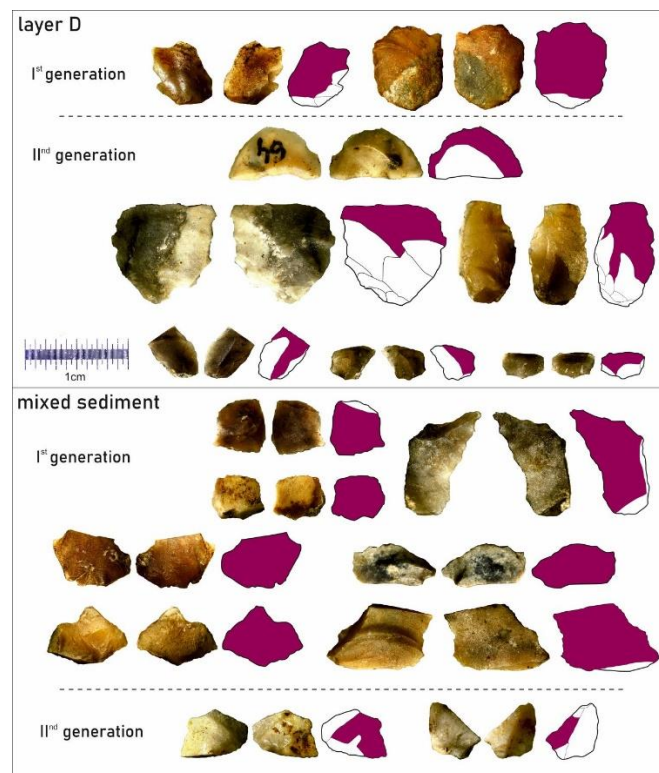

407  
 408 **Fig 6.** The first of second generation of ventral thinning chips containing remnants of the ventral surface of the  
 409 blank (marked in pink) on their dorsal side. Artefacts found in layer D and in the mixed sediment, trench  
 410 IX/2017 in Koziarnia Cave.

411 **Table 5.** Comparison of features determined in chips obtained during experimental leafpoint shaping, with the  
 412 archaeological material from layers K/K', D and H'/I/H/I'/L indicating the presence of ventral thinning chips in  
 413 layer D.

| Feature/Layer                | Experimental assemblage | Layers K/K' | Layer D | Layers H'/I/H/I' and L |
|------------------------------|-------------------------|-------------|---------|------------------------|
| <i>Total number of chips</i> |                         | 32          | 44      | 133                    |

|                                                                                       |    |     |    |     |
|---------------------------------------------------------------------------------------|----|-----|----|-----|
| <i>First generation of ventral thinning [flake/chip with double ventral surface]</i>  | ++ | -   | ++ | -   |
| <i>Second generation of ventral thinning [chips with remnants of ventral surface]</i> | ++ | -   | ++ | -   |
| <i>Second generation of thinning [bent short chips]</i>                               | ++ | (+) | ++ | ++  |
| <i>Flake/chip with orthogonal scars</i>                                               | ++ | (+) | +  | -   |
| <i>Curving flakes/chips from dorsal thinning</i>                                      | +  | -   | -  | -   |
| <i>Thin elongated chips</i>                                                           | ++ | -   | ++ | (+) |
| <i>Presence of lip</i>                                                                | ++ | +   | +  | ++  |

## 414 Other artefacts

### 415 Holocene

416 The upper parts of the mixed sediment provided a minimal number of Holocene period finds, consisting  
 417 of pottery, a glass artefact and metal objects. The ceramic assemblage is highly fragmented and poorly  
 418 preserved. It comprises 6 pieces of uncharacteristic prehistoric pottery sherds, 1 fragment of Roman-  
 419 period wheel-turned ware fired in reducing atmosphere, and 2 pieces of vessels dated to the 18<sup>th</sup> or 19<sup>th</sup>  
 420 century, made of white clay and covered with yellow glaze. The find assemblage is supplemented with  
 421 a small fragment of a patinated glass artefact, possibly a vessel, and small pieces of undefined metal  
 422 objects. Due to their poor preservation, the chronology of these finds must remain uncertain.  
 423 Considering the recently discovered Holocene period finds, it is fair to say that they do not bring new  
 424 data to the studies of the use of Koziarnia in late prehistory and historical times. Some more detailed  
 425 insights into this topic were provided thanks to previous research campaigns, which were focused on  
 426 the entrance zone to the cave. As evidenced then, the site was extensively used since the Neolithic up  
 427 until the modern period [27]. The small amount of Holocene period finds from the 2017 excavations has  
 428 to be seen in the context of the distance of the trench from the cave mouth.

### 429 Layer K, K'

430 Both horizons are described together since layer K' has the same petrological features as layer K. The  
 431 only difference is the presence of a high concentration of charcoal in layer K', which changed the  
 432 colouration of the layer. Therefore, one can assume that layer K' is a human occupation episode within  
 433 the accumulation of layer K. Due to the significant destruction of the top levels, layers K and K' were  
 434 visible only in a tiny area of ca. 1 m<sup>2</sup>. The lithic assemblage consists of 139 artefacts. It should be noted  
 435 that materials from the layer determined ad mixed + K were also included.

436 Interestingly, almost half of the artefacts from layers K and K' have traces of fire, which goes well with  
 437 the high concentration of charcoal. The majority of artefacts were post-depositionally damaged. Out of  
 438 the 53 flakes and blades, only five were found unbroken. Nonetheless, the assemblage contains clear  
 439 Middle Upper Palaeolithic i.e. Gravettian, elements represented by five fragments of backed bladelets  
 440 (Fig 7 FLO/A34/17, FLO/A45/17a, FLO/A96/17, FLO/A45/17c, FLO/A45/17e), an endscraper (Fig 7  
 441 FLO/A45/17d) and a double microburin, reworked into a double perforator (?) (Fig 7 FLO/A45/17b).  
 442 Besides the tools mentioned above, one burin spall has been noted, as well as a small bladelet, which  
 443 could be either a burin spall or crested blade. The assemblage consists of blades and bladelets and is  
 444 distinct from the other assemblages due to the use of excellent quality almost translucent Jurassic flint  
 445 raw material. However, not much can be said about the technology and morphometric characteristics of  
 446 the assemblage, as mostly medial and distal flake and blade fragments were recovered.

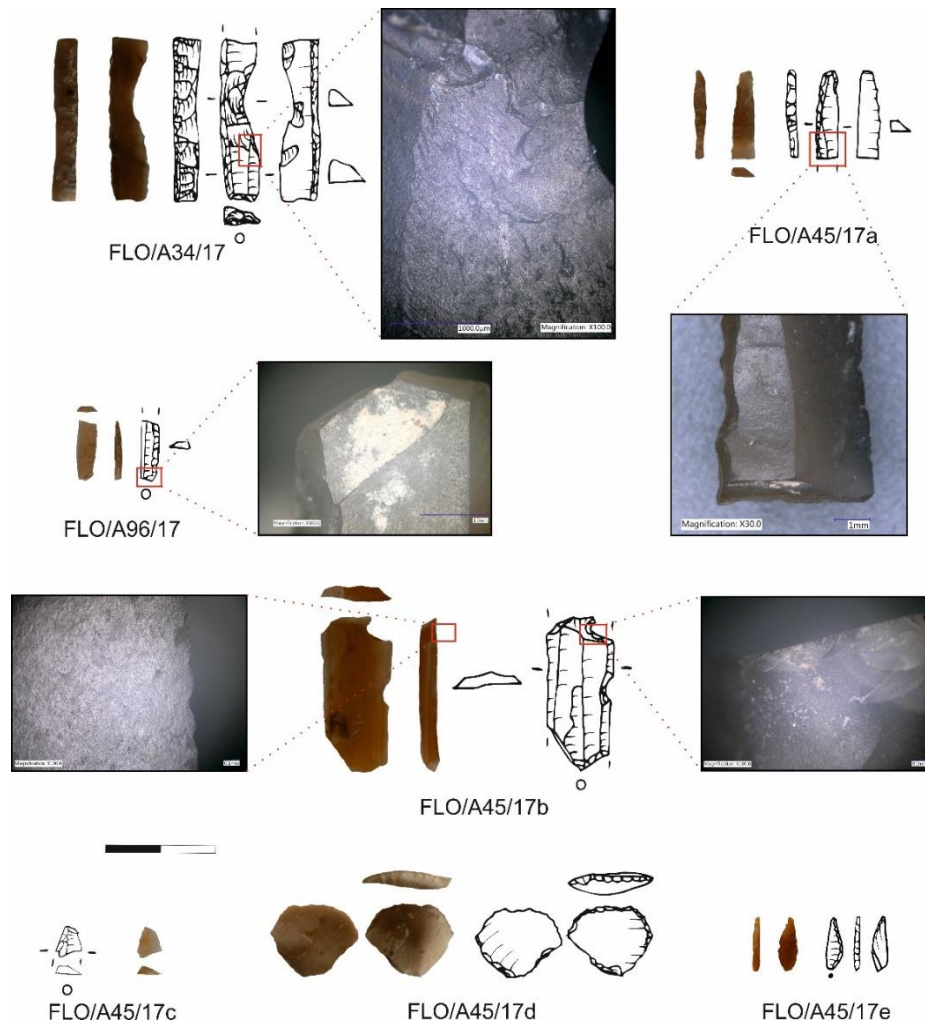

447

448 **Fig 7.** Gravettian artefacts found in layer K and K' in trench IX/2017.

449

450 Use-wear traces - linear traces and impact fractures [67] have been observed on four small backed  
451 bladelets, based on which it could be assumed that they were used during activities linked to hunting  
452 (Fig 7: FLO/A34/17, FLO/A45/17a, FLO/A96/17, FLO/A45/17c).

453 The first of them (FLO/A34/17) is characterised by the lack of any distinct post-depositional traces. In  
454 its middle fragment, linear traces were observed running outward from the chipping negatives. These  
455 marks are located on the lateral edge, intentionally left unretouched. The distinguished linear traces are  
456 located parallel to the tool's axis of symmetry. The placement of these marks indirectly indicates the  
457 method of depositing it, i.e. with the backed bladelet parallel to the shafts. Additionally, the breakage of  
458 the tip was observed to have a straight profile, which could be associated with hunting weapons, but  
459 fracturing of this kind is not distinctive for this type of activities.

460 In turn, the second backed bladelet (FLO/A96/17) should be noted for its characteristic breakage of the  
461 tip. The impact fracture (hinge terminating bending fracture) has been identified. This type of breakage  
462 morphology usually enables to link the tool with hunting weaponry. In addition, the linear traces  
463 observed in the middle part of the tool can be connected, due to their underdeveloped form, with its use  
464 as a projectile, but simultaneously the influence of post-depositional factors cannot be excluded.

465 The third backed bladelet (FLO/A45/17a) is characterised by an impact fracture (step terminating  
466 bending fracture) in its bottom part. The macroscopic morphology of the trace suggests to a certain  
467 extent that the described backed bladelet might have been used as a hunting weapon.



468 It cannot be excluded that also the next specimen (FLO/A45/17c) was used during hunting. This is the  
469 upper fragment of a backed bladelet broken in a unique manner; one end of the breakage with a concave  
470 profile is elongated. The artefact might have been the tip of arrowhead projectile.

## 471 Layer D

472 Compared to other layers, this one contained a relatively rich assemblage (n=137), although the  
473 materials were heavily damaged, mostly through breakage (Table 4). Among the 90 blades, bladelets  
474 and flakes, only six were unbroken. Most of the flakes represent undeterminable debitage; however, at  
475 least some of them have negatives attesting to bidirectional knapping (Fig 6), which is a characteristic  
476 feature of Jerzmanowician [14, 21]. A single flake has the features of a bifacial shaping flake.

477 On the same level as layer D, but in the disturbed sediment of the old trenches, a blade with ventral  
478 thinning of the bulb was found (Fig 8: A1/17). The artefact may be interpreted as the broken part of a  
479 leafpoint; however, it contains numerous post-depositional retouches, which changed its shape. The  
480 usewear traces located along its longitudinal edges but due to the underdeveloped form of the polishes  
481 their detailed origin cannot be determined. However, the provenience of the usewear traces is unclear.

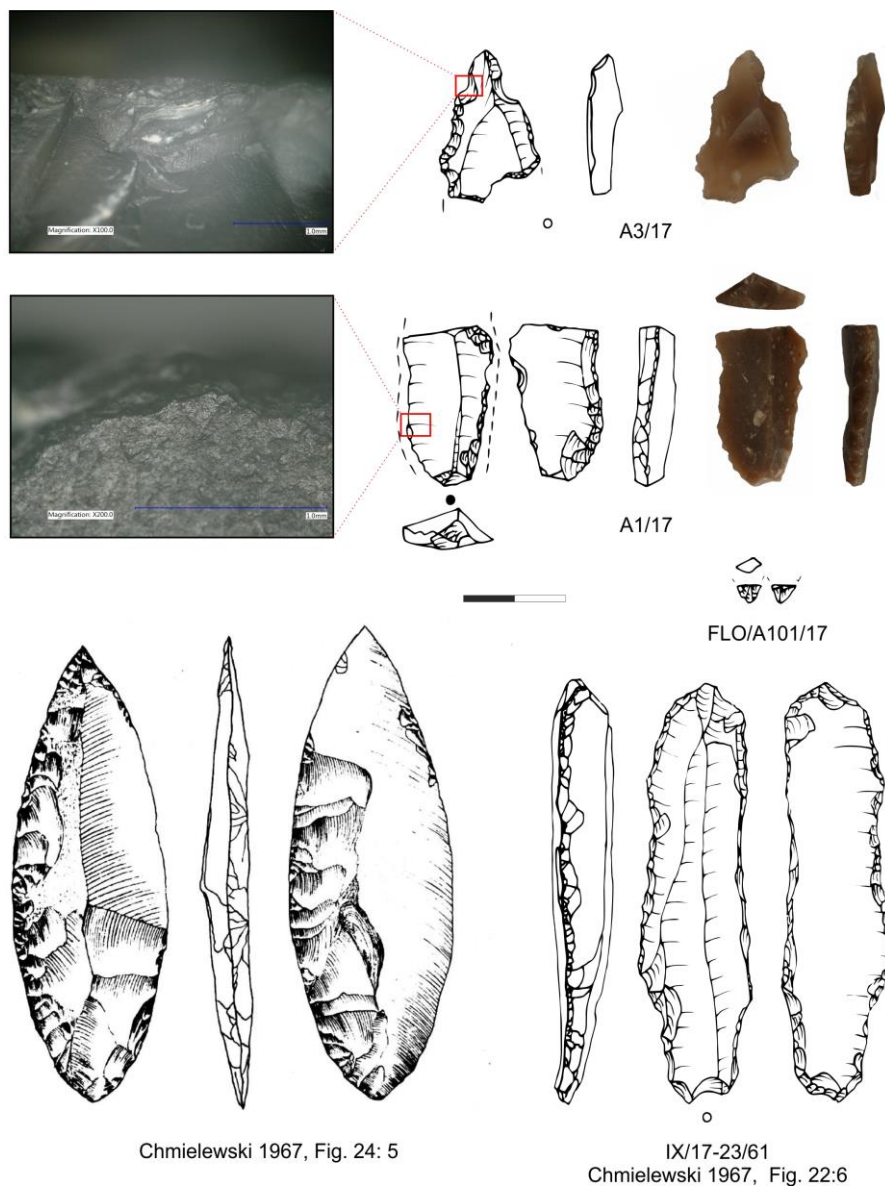

482

483 **Fig 8.** Artefacts from Koziarnia Cave attributed to Jerzmanowician. A3/17, FLO/A101/17 found in trench  
484 IX/2017 in layer D; A1/17 found in mixed sediment in trench IX/2017; Leafpoint was found by F.Römer in the  
485 second half of 19<sup>th</sup> century [24, 27]; IX/17-23/61- blade made on double platform core found by W. Chmielewski  
486 in layer 17 of trench IX, later called layer 15 in the final publication. [27].

487

488 To conclude, one can see at least several features indicating that one is dealing with traces of  
489 Jerzmanowician occupation in layer D. The most prominent among these are the above-described  
490 presence of the ventral thinning chips (Fig 6) and thedebitage with bidirectional scars. A bidirectional  
491 knapping scheme is confirmed also by a big blade detached from a bidirectional core found in the same  
492 layer by W. Chmielewski (Fig 8: IX/17-23/61).

### 493 **Layers E, F, G**

494 These three layers represent one geological sedimentary event affected by human occupation, which can  
495 be traced in layer F. This layer is characterised by a high concentration of charcoal, but only a single  
496 artefact was found inside (Table 4). The above and underlying layers E and G contained in total 21  
497 artefacts (Table 4). They consist of uncharacteristic elements, with a single bifacial shaping flake from  
498 layer E. The cultural attribution of the assemblage is impossible.

### 499 **Layer H, H', I, I'**

500 The assemblage found in the lowermost layers consists of 436 artefacts (Table 4). The flakes represent  
501 only undeterminabledebitage. The edges are heavily damaged due to post-depositional retouches  
502 creating pseudo-retouched tool-like artefacts. The pseudo-retouches are present even on the 0.3-cm-long  
503 chips, indicating the intensity of the post-depositional damage. At least ten chips and flakes can be  
504 described as bifacial thinningdebitage due to their knapping angle (60°-70°).

505 The assemblage contained one endscraper (Fig 9: A9/17), and possibly one “groszak” (Fig 9: A6/17).  
506 No usewear traces were found on these artefacts. A single flake contains a multiscarred butt in the shape  
507 of a *chapeau de gendarme*. All the described features indicate that these layers should be attributed to  
508 the Middle Palaeolithic. Unfortunately, the small size of thedebitage and a high post-depositional  
509 damage unable more detailed cultural attributions.

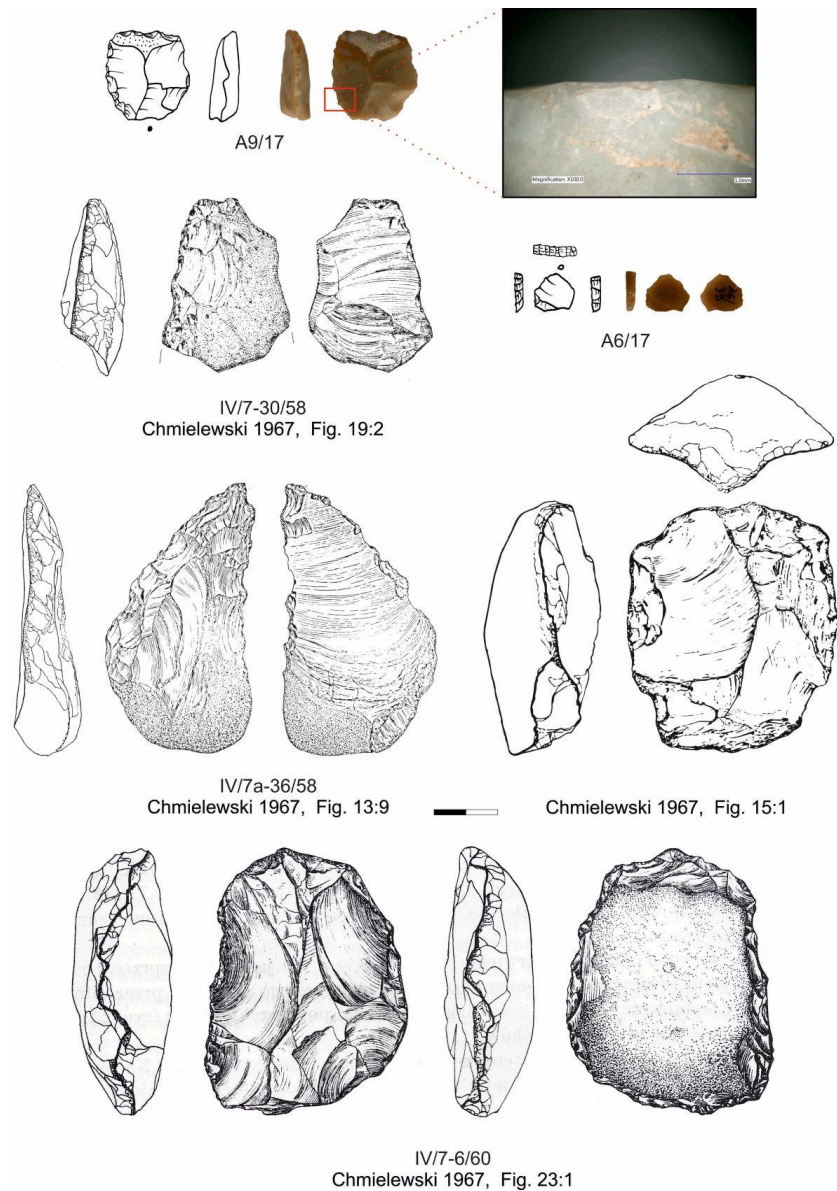

510

511 **Fig 9.** Middle Palaeolithic artefacts from Koziarnia Cave found recently in layers H'-L and by W.Chmielewski  
512 in layers 17-20 [27].

513

### 514 **Layers L, M**

515 They include 26 artefacts (Table 4) containing three retouched flakes and a single bifacial shaping chip  
516 (Table 5).

### 517 **Bone Artefacts**

518 Two unpublished bone tools from Koziarnia cave were found in F. Römer's collection. One of the tools  
519 is a short broken piece of bone with a smoothed ending (Fig 10:1). Numerous lengthwise cracks and  
520 chippings linked to exfoliation were observed on this artefact. One of the endings has been broken as a  
521 result of natural factors, while the other was formed diagonally through being burnished on a stone pad.  
522 No traces of usewear enabling the identification of its function were observed on the artefact.

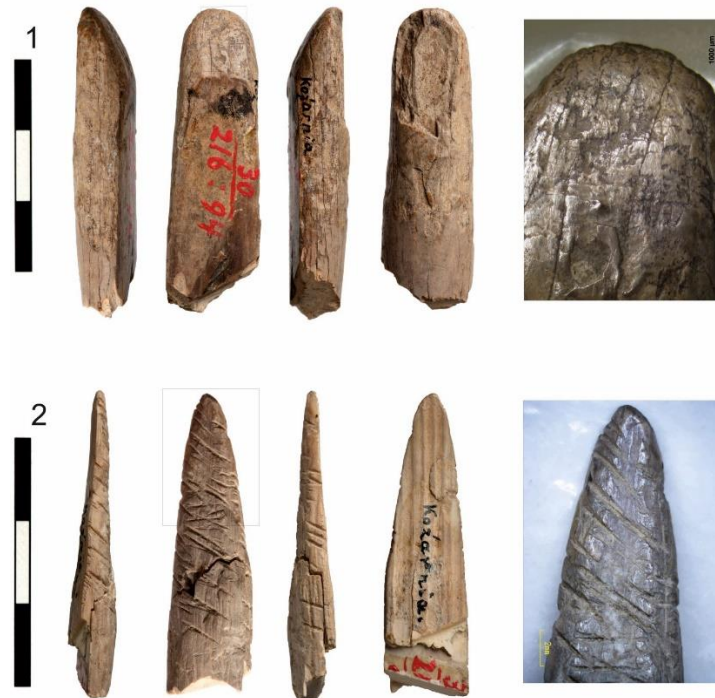

523

524 **Fig 10.** Bone artefacts found by F. Römer in Koziarnia Cave. (1) Fragment of broken bone with smothered  
525 ending. (2) Fragment of bone point with incisions. Photo M. Bogacki

526

527 The second piece is a part of a bone point with multiple incisions on its outer surface (Fig 10:2). Wide  
528 linear marks of different depths, overlapping each other and parallel to the longer axis of the artefact,  
529 were observed. They had been formed during the shaping of the blade through being scraped by a flint  
530 tool. On the entire surface of the blade, there are distinct, deep and wide diagonal notches located parallel  
531 to each other, only intersecting in the middle part of the tool. They were made with a flint flake or chip  
532 through repeated sawing backwards and forwards. This type of notch should be seen as a kind of artefact  
533 decoration. The surface of the artefact is smoothed and useworn, especially at its tip.

534 The spectra obtained from both bone specimens through ZooMS analysis have been taxonomically  
535 identified as Elephantidae. The marker series are similar for some closely related species. In this case,  
536 possible species can belong to the *Elephas*, *Mammuthus*, and *Palaeoloxodon* genera. Considering the  
537 archaeological context, these two bone tools were most likely manufactured from woolly mammoth  
538 remains.

539 Both artefacts obtained similar radiocarbon dates of 25-26 cal. ky BP (Table 1), which are younger than  
540 the chronology of the uppermost layers excavated in 2017. These radiocarbon dates indicate the presence  
541 of later Gravettian occupation in Koziarnia. It was most probably connected to one of the layers already  
542 destroyed in the cave.

## 543 Discussion

### 544 Koziarnia – correlation of layers

545 The stratigraphy observed in the 2017 trench fits well the description and documentation of the  
546 stratigraphy of trench IX by W. Chmielewski. The only difference is the presence of at least four separate  
547 strata, which were treated as a unified layer 17 by W. Chmielewski. Based on the new fieldwork, one  
548 can differentiate at least four substrata within the layer 17, differing due to the presence of weathered  
549 limestone clasts and the colouration (from the top: layers H', I, H, I'). Traces of the relatively most  
550 intensive human occupation were found in the uppermost layer H' and the lowermost layer I'.



551 The second difference between the cross section presented by Chmielewski and the recent study is the  
 552 relatively small amount of charcoal found in layer K', which can be correlated with layer 13 by  
 553 Chmielewski. Nonetheless, this layer contained the highest number of charcoal fragments in the entire  
 554 sequence but their concentrations did not change the colouration of the stratum, as had been observed  
 555 by Chmielewski in trenches IX and especially IV & V. As long as these layers can be correlated with  
 556 human occupation, one can presume that the highest charcoal concentration could indicate an occupation  
 557 zone, which weakens as it nears the end of the cave corridor.

558 The comparison of all the available drawings of the cross sections from all the previously conducted  
 559 fieldwork enables to reconstruct the general correlation of the layers (Fig 11). Based on such correlation,  
 560 one can see that the trenches located in the entrance zone revealed the presence of a thick Holocene  
 561 sequence of humic horizons and underlying loess layers, which can be divided into two separate  
 562 horizons. The loess sediments, through a comparison to other caves in the region, can be correlated with  
 563 units 'A' and 'C', according to the lithostratigraphic scheme by Krajcarz et al. [68] and dated to late  
 564 MIS 3 and MIS 2. However, we don't have any direct dating data. All the older strata were probably  
 565 washed away from the entrance zone before the late MIS 3. The most problematic issue linked to the  
 566 whole stratigraphy of the Koziarnia Cave is the almost absolute destruction, removal and mixing of the  
 567 sediments of the main chamber, which was probably the central settlement zone with the highest  
 568 concentration of artefacts. The uppermost layers located inside the cave were almost completely  
 569 removed in the 19<sup>th</sup> century. The remnants of the original stratigraphy can be found only attached to the  
 570 regolith visible on the wall of the main corridor. The current cave infilling only contains layers dated to  
 571 MIS 3, except for the lowermost strata M (21) and P, which might be older.

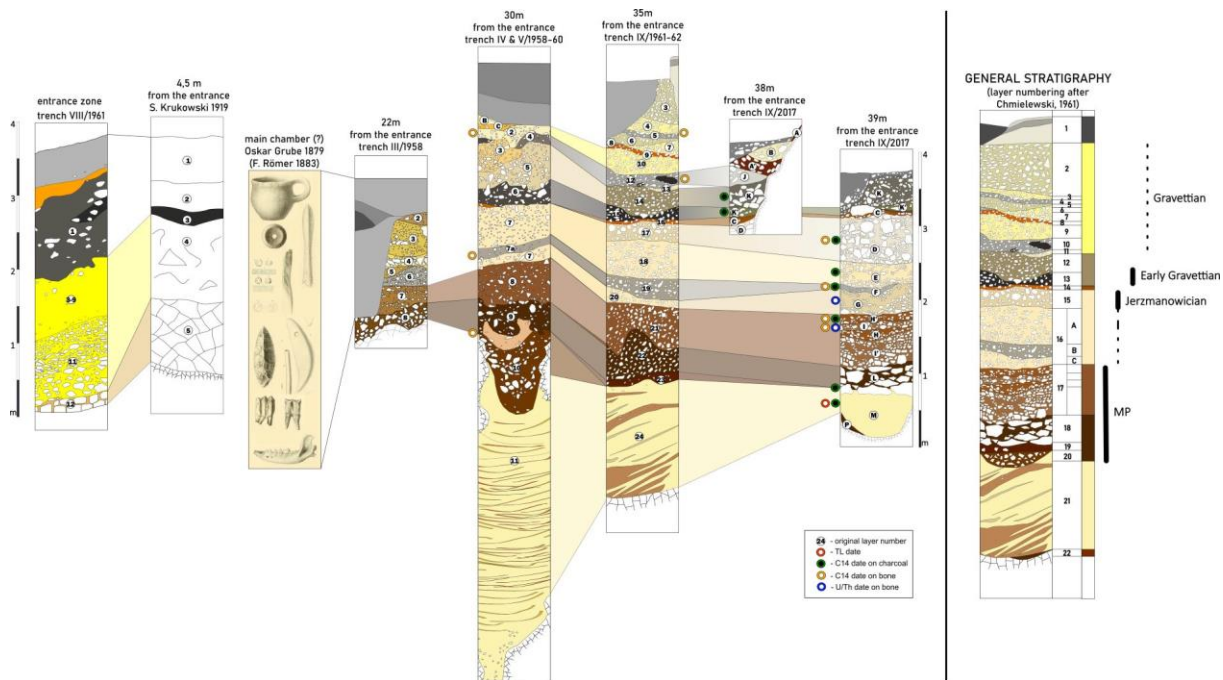

572  
 573 **Fig 11.** Correlation of all the profiles obtained during subsequent archaeological fieldworks in Koziarnia Cave  
 574 with a location of samples used for dating. S. Krukowski field documentation [after 35, 36]; artefacts found by F.  
 575 Römer [24]; W. Chmielewski profiles redrawn after Chmielewski [27] and a field documentation of trench VIII,  
 576 trench IV, V & IX.

577  
 578 Based on the artefacts found and the obtained dates, one can see at least four different Palaeolithic  
 579 settlement episodes in the cave. The Middle Palaeolithic is connected to layers 17(H'/I/H/I') and 18 (L),  
 580 Jerzmanowician – to layers 15-16 (D-E-F-G), and the Early Gravettian – to layers 13-12 (K-K'). The  
 581 later Gravettian episode (25-26 ky BP) cannot be attributed to any particular stratum but was manifested  
 582 by the presence of two bone tools found in F. Römer's collection.

583 The general correlation of the layers shows that the amount of charcoal in the Early Gravettian horizon  
584 diminishes towards the end of the cave, and is the most intense approximately 20-25 m from the  
585 entrance. In contrast, the thickness of the Jerzmanowician layers 15-16 increases as they near the end of  
586 the cave (a 75-cm-thick layer is 40 m from the entrance), while they disappear towards the cave entrance.

## 587 **Chronology**

588 Most of the established dates cover the period between 46 and 24 ky cal. BP. However, several charcoal  
589 datings provided unexpectedly recent ages (Table 1). Based on the taxonomical analysis of the charcoal  
590 assemblages, it can be assumed that a part of the floated samples were indeed contaminated and this can  
591 be confirmed by the presence of a few samples containing singular findings of charcoal fragments  
592 belonging to fir *Abies alba*, hornbeam *Carpinus betulus* and beech *Fagus sylvatica*, trees that are  
593 considered late-coming species in the vegetation history of Poland [69]. Such samples came mostly from  
594 areas located near the previous excavations. After preliminary analysis, the existence of post-  
595 depositional disturbances was confirmed, indicating these places as ones that should be excluded from  
596 any chronological inference. However, in a few other samples, only coniferous taxa were found (juniper  
597 *Juniperus communis* and pine *Pinus* type *sylvestris-mugo*), which suggests that they could have  
598 originated from Pleistocene layers, but their radiocarbon dating showed modern contamination (Table  
599 1). This analysis has evidenced that the very meticulous study of strata in the context of all  
600 archaeological and biological findings is needed to understand taphonomic processes in cave sites.

601 Another explanation for the observed discrepancy between the dates achieved from bones and at least  
602 some dates achieved from charcoal, includes the altered  $^{14}\text{C}$  content in charcoal fragments. From recent  
603 study [70] we know that carbon in wood during the high temperature processing (such as burning) is a  
604 subject to kinetic fractionation of isotopes. Namely, charcoal from coniferous wood burned in low  
605 temperatures is enriched in heavy carbon and oppositely, burned in higher temperature (400-600 °C) is  
606 depleted in heavy carbon in relation to the original wood. If dated charcoals became from burning in  
607 relatively low temperatures, e.g. in the outer part of fireplace, this may likely produce a shift to younger  
608 radiocarbon dates.

609 It is worth noting that the radiocarbon dates from layer D are not in the correct order with those from  
610 the lower strata (Fig 4). This can be an effect of the mentioned isotopic fractionation in burnt wood, or  
611 likely the effect of re-depositional episodes, possibly related to the erosional structures visible in layers  
612 E and D. The directions of this transport are difficult to reconstruct as the 2017 excavation area was  
613 quite small and delivered minimum data on the geometry of sedimentary structures. Moreover, the  
614 topography of the cave floor was disturbed here due to the previous exploitation. However, the higher  
615 elevation of sediments in the area closer to the entrance (especially visible in W. Chmielewski's trench  
616 at the 30th metre) may suggest that this area served as a source of material for colluvial activities. If we  
617 adopt the hypothesis that at least some dates from the upper layers represent a re-deposited material, we  
618 need to accept that the faunal, anthracological and archaeological assemblages from these layers could  
619 also have been affected by colluvial mixing.

620 If we look at the distribution of the probability density of radiocarbon dates regardless of the stratigraphy  
621 (Fig 12) we can detect several phases of the deposition of dated material. The phases of deposition of  
622 the animal remains took place ca. 46-41 ky cal. BP, ca. 37-35.5 ky cal. BP, and ca. 32-28.5 ky cal. BP.  
623 The dates from charcoal fragments are restricted to ca. 39-31 ky BP, while the dated bone tools to ca.  
624 26.5-24 ky cal. BP. Assuming that charcoal fragments are the remnants of hearths, the probability  
625 density of radiocarbon dates for charcoal represents the human settlement phase. During this phase, we  
626 can identify three weakly separated subphases. The first one can be dated to ca. 39-36 ky cal. BP  
627 (represented by two dates) whereas the second to ca. 35-33.5 ky cal. BP (a single date), and the third to  
628 ca. 33-31 ky cal. BP (a single date). Due to the stratigraphic position of the samples, we may assume  
629 that the first phase is connected with Jerzmanowician occupation, while the second and third with Early  
630 Gravettian. The last human settlement phase in 26-24.5 ky cal. BP also represents traces of the  
631 Gravettian occupation. Another phase, not shown in Fig 12, is the modern one (around 300 y BP until  
632 modern times), based on the most recent dates achieved for the charcoal.

633

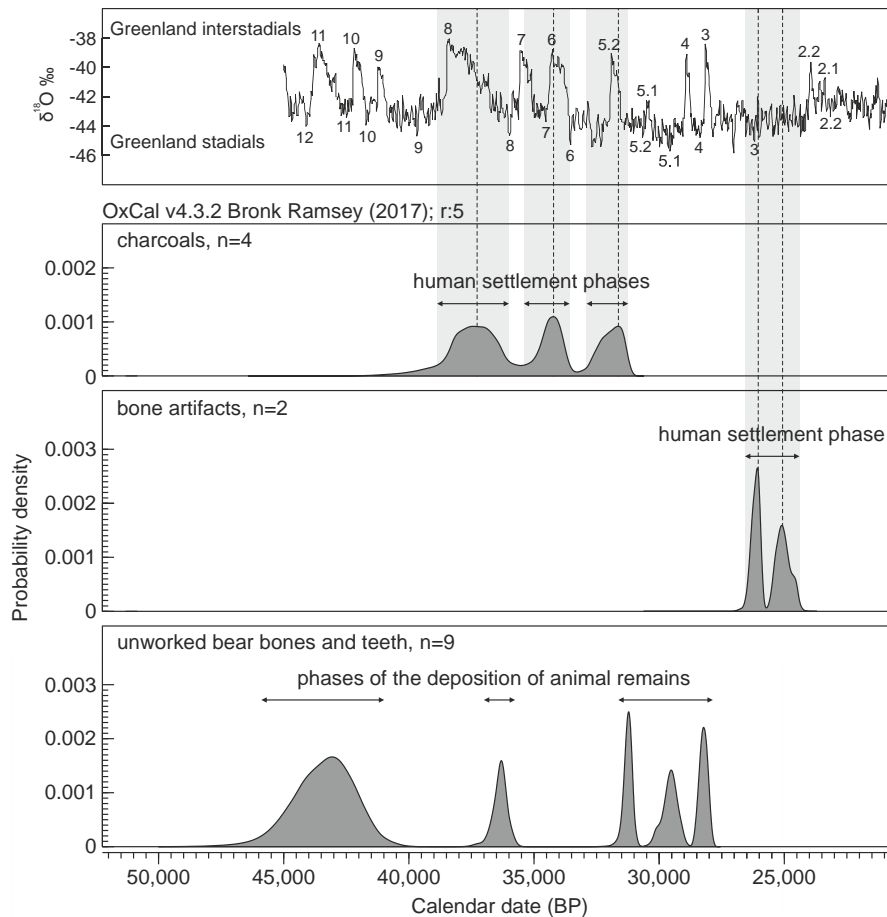

634

635 **Fig 12.** Distribution of the probability density of calibrated radiocarbon dates for Koziarnia Cave obtained for  
636 charcoal fragments (pink) and bone tools (yellow) compared with the revised  $\delta^{18}\text{O}$  curve in the Greenland ice  
637 core (blue) obtained by combining the Cariaco Basin (Hulu Cave) and Greenland ice core (GICC05) records  
638 [73]. Corresponding Greenland stadials (GS) and interstadials (GI), as determined by Rasmussen et al. [74] and  
639 Seierstad et al. [75] are indicated by numbers placed below or above the  $\delta^{18}\text{O}$  curve, respectively. The four most  
640 recent dates are excluded.

641

642 It is worth taking note of the alternate occurrence of dates determined for charcoal fragments and animal  
643 remains (Fig 12). All the dated animals were bears (mostly the cave bear, but one date has also been  
644 established for the brown bear). Bears used the caves as hibernation dens, and their presence in a cave  
645 could not be contemporaneous with human settlement [71, 72]. Our dataset indicates that Koziarnia  
646 Cave indeed had been alternately occupied by humans and bears.

647 In Fig 12, we compared the distribution of the probability density of radiocarbon dates with the pattern  
648 of the revised  $\delta^{18}\text{O}$  curve in the Greenland ice core. The curve represents reliable climate proxy  
649 reflecting global climatic changes in the Pleistocene [73-75]. If we take into account dates obtained for  
650 charcoal fragments and bone tools, which are direct indicators of human settlement in Koziarnia Cave,  
651 we can notice interesting relationships. Three peaks of the charcoal date distribution well correspond  
652 to three warmer periods (Greenland interstadials, GI-8, GI-6 and GI-5.2), whereas the minima of this  
653 distribution coincide with colder periods (Greenland stadials, GS-8 and GS-6). Although the date  
654 distribution for bone artifacts is shifted to Greenland stadal GS-3, there is a clear gap between these  
655 two distributions, which corresponds to the coldest stadal GS-5.1. This result suggests that Koziarnia  
656 Cave could be inhabited by human groups in waves especially in warmer periods, whereas climate  
657 cooling could discourage people from settling in this place.

658 **Other sites – correlation of profiles**

659 Jerzmanowician assemblages are known from Nietoperzowa, Mamutowa, Puchacza Skala and Shelter  
660 above the Zegar Cave sites in Poland [20, 76–79]. The stratigraphic correlation of Jerzmanowician-  
661 bearing strata from Koziarnia Cave and Nietoperzowa Cave was studied by T. Madeyska-Niklewska  
662 and was first presented by Chmielewski et al. [27] and then by Madeyska-Niklewska [80]. According  
663 to this interpretation, layer 15 (D) from Koziarnia, where we found traces of Jerzmanowician  
664 occupation, correlates with layer 10b of Nietoperzowa Cave. However, the Jerzmanowician settlement  
665 is well-known from the younger layers 4-5-6 of Nietoperzowa Cave. It is difficult to compare the  
666 sequences from both caves based on the lithology, as they represent rather different facies (Fig 13).  
667 Sediments from Nietoperzowa Cave are mostly silty loams with limestone clasts, deposited in the near-  
668 entrance area under the strong influence of aeolian activity. In Koziarnia Cave, the recognized sediments  
669 are coarser, they were deposited quite deep inside the cave, and they are mostly limestone debris.  
670 However, the proportion of angular to subangular clasts, presented by Madeyska-Niklewska [80],  
671 enables correlating the Jerzmanowician layer 15 (D) from Koziarnia Cave with either the lowermost or  
672 the uppermost Jerzmanowician-bearing strata from Nietoperzowa Cave, namely layers 6 or 4.

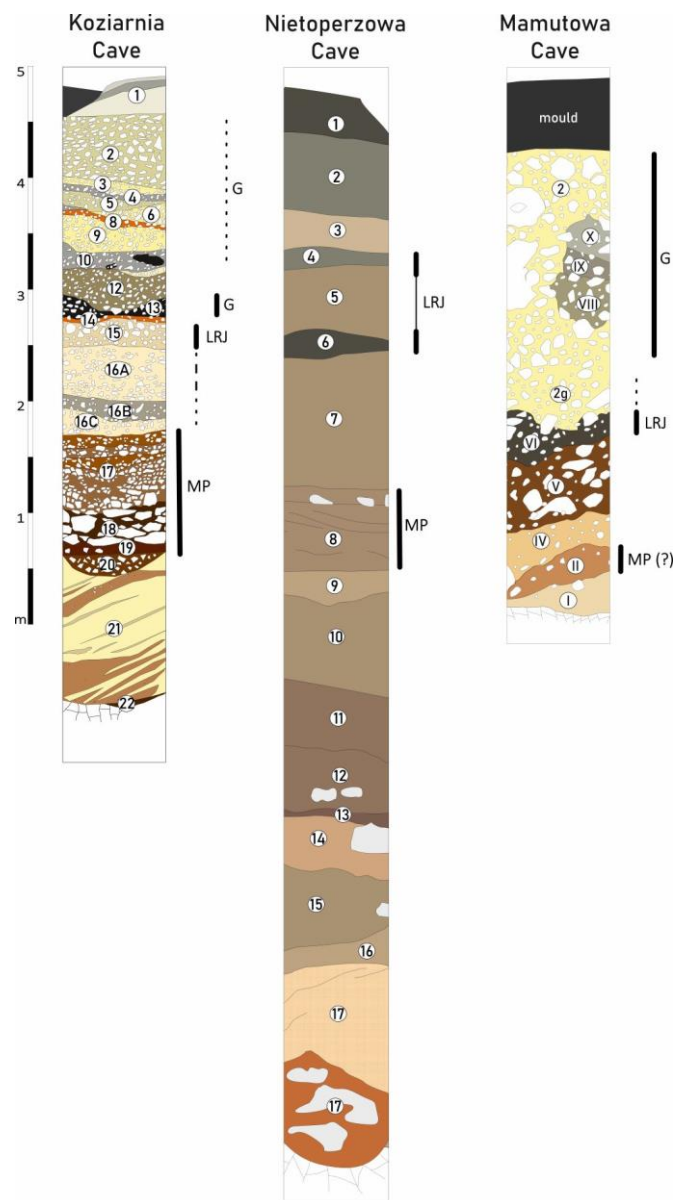

673

674 **Fig 13.** Correlation of profiles from three Jerzmanowician sites: Nietoperzowa Cave [33], Mamutowa Cave [81,  
675 82] and Koziarnia Cave. Symbols used: G- Gravettian; LRJ - Lincombian-Ranisian-Jerzmanowician; MP -  
676 Middle Palaeolithic.

677



678 In Mamutowa Cave, the Jerzmanowician assemblage was found in layer VI [76, 81–83], which was  
679 blackish due to a significant concentration of charcoal (Fig13). Unfortunately, a detailed stratigraphic  
680 comparison between Koziarnia and Mamutowa caves are restricted due to the different character of the  
681 sediment at both sites. Kowalski's layer V overlying the Jerzmanowician horizon was mostly loess  
682 sediment, which is not present inside the gallery in Koziarnia.

683 Interesting conclusions can still be derived from a comparison of the radiocarbon chronology of  
684 Koziarnia Cave with other sites of the Middle/Upper Palaeolithic transition and early Upper Palaeolithic  
685 from southern Poland (Fig 14) . The chronology of the Jerzmanowician assemblages is currently based  
686 on 38 radiocarbon dates [S3, 33]. The majority of the radiocarbon datings were obtained on either cave  
687 bear (n=29) or bird (n=4) bones without human activity traces. Taking into consideration the fact that  
688 cave bears and possibly also birds of prey did not cohabit the caves with humans, in order to determine  
689 the chronology of human occupation, we shall instead rely on radiocarbon dates provided by charcoal,  
690 bones with cut marks, or animal species which do not naturally live in caves, such as mammoths. If we  
691 take this into account, one can limit the list of reliable dating for LRJ into four measures i.e.:

- 692 •  $33,100 \pm 1200$  BP (wood charcoal, Koziarnia Cave, layer F, Poz-110657, this study);
- 693 •  $33,230 \pm 480$  BP (wood charcoal, Koziarnia Cave, layer H', Poz-98901, this study);
- 694 •  $32,500 \pm 400$  BP (woolly mammoth, Nietoperzowa Cave, layer 5b, Poz-23628 [32]);
- 695 •  $38,160 \pm 1250$  BP (wood charcoal, Nietoperzowa Cave, layer 6, Gro-2181 [20]).

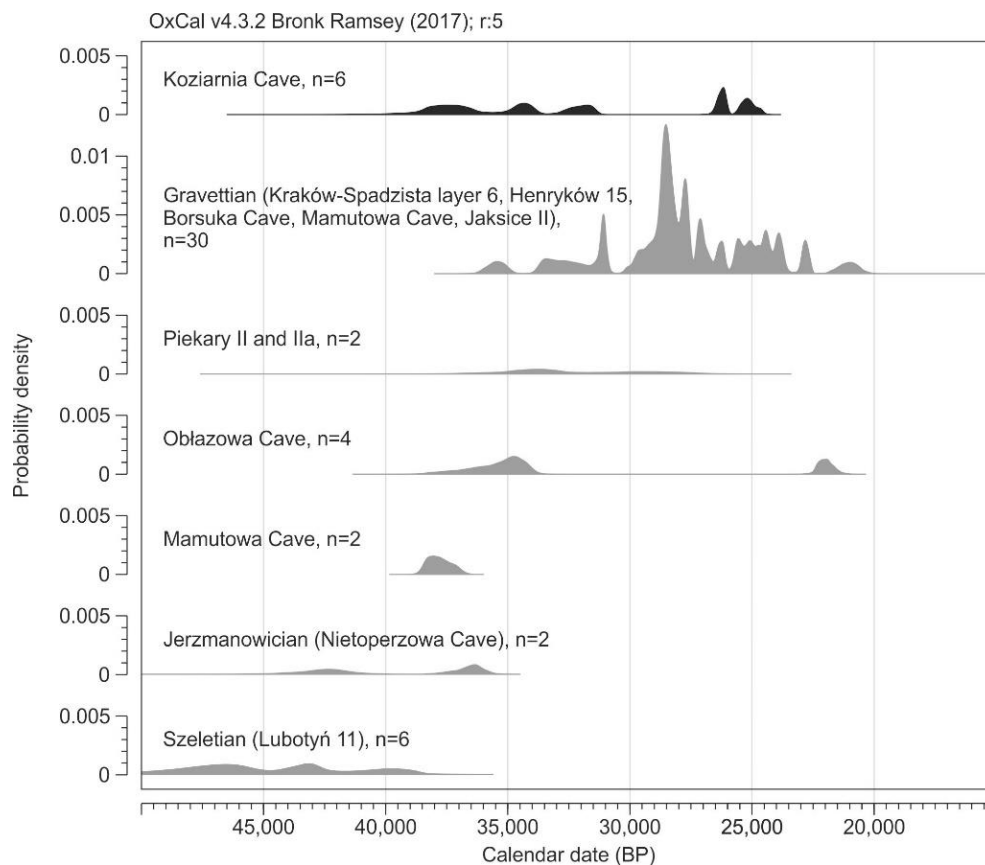

696

697 **Fig 14.** Correlation of the probability density distribution of radiocarbon dates from Koziarnia Cave,  
698 Middle-to-Upper Palaeolithic transition sites and early Upper Palaeolithic sites from southern Poland.  
699 Only the dates representing human settlement are regarded here (in the case of multi-strata cave sites –  
700 only the charcoal and reworked bones/ivory; in the case of single-stratum open-air sites – all the dates  
701 from a cultural layer). [Dates after 9, 20, 32, 86-98].

702

703 As long as the oldest date was obtained from the lower Jerzmanowician layer in Nietoperzowa Cave,  
704 one can assume that the presented set of dates demonstrates two separate settlement episodes. In such a

705 case, the Jerzmanowician settlement in Koziarnia Cave could be tentatively correlated with the upper  
706 Jerzmanowician horizon in layer 4 in Nietoperzowa Cave, and represent the younger phase of  
707 Jerzmanowician.

708 Moreover, one should take into consideration the radiocarbon dates obtained recently on two bone points  
709 of the Mladeč type from Mamutowa Cave (38,5-36,5 ky cal. BP- S2), which overlap with those from  
710 Koziarnia Cave. Although Mladeč-type points are still believed to represent rather the Aurignacian  
711 tradition, in Mamutowa Cave no other Aurignacian artefacts were found either by Zawisza [84, 85] or  
712 Kowalski [76, 83]. Kowalski, who studied the stratigraphy in detail, determined a single Jerzmanowician  
713 layer (VI) and Gravettian occupation traces in loess layer 2. The radiocarbon-dated bone point comes  
714 from the old excavations by Zawisza; thus, their original stratigraphic position is impossible to establish,  
715 besides the information that they came from the inner part of the section.

716 The recent project on the <sup>14</sup>C dating of the available Early Upper Palaeolithic bone points shows that  
717 they represent a broad chronology starting from 43 up to 34 ky cal. BP [94]. At several sites (Istalöskö,  
718 Dzerava Skala), such bone points were found in the company of leafpoints [99-104]. What is more,  
719 traces of Aurignacian occupation in Poland are very scarce and limited to several sites (e.g. Piekary II,  
720 Obłazowa layer VIII, Góra Puławska) [105-107], while the only available radiocarbon dates indicate the  
721 earliest Aurignacian settlement started around 36 ky cal. BP and is slightly younger than both bone  
722 points from Mamutowa Cave and the Jerzmanowician occupation in Koziarnia Cave.

723 The bone points from Mamutowa Cave are older than the oldest available Aurignacian dating north of  
724 the Carpathians, but at the same time they overlap with the Jerzmanowician settlement in Koziarnia and  
725 Nietoperzowa Caves. One can, therefore, assume that they could have originally belonged to the  
726 Jerzmanowician assemblage in Mamutowa Cave. Unfortunately, the chronology of Mamutowa Cave is  
727 mostly based on radiocarbon dates made on cave bear and bird bones. The sets of dates from underlying  
728 and overlying strata as well as from layer VI indicate some post-depositional sediment mixing (S2).

729 The possibility of the long chronology of the LRJ technocomplex exceeding the Campanian Ignimbrite  
730 (CI) eruption event is confirmed also by results obtained in Lincombian sites e.g. Beedings, indicating  
731 its lasting up to even 30 ky BP [108].

## 732 **Gravettian occupation**

733 It is worth noting that aside from the Middle Palaeolithic and Jerzmanowician, also two Gravettian  
734 occupation phases can be identified in Koziarnia Cave. The first one could be correlated with the second  
735 and third human settlement phase recorded by the charcoal dated to 35-31 ky cal. BP (Fig 14). This  
736 dating overlaps with the earliest traces of the penetration of Gravettian hunters, confirmed recently in  
737 Henryków 15 in the Sudetes piedmonts. The chronology of the settlement traces in Koziarnia Cave  
738 indicates that the earliest Gravettian groups penetrated not only the nearest vicinities of the Moravian  
739 Gate but went much further into the Polish Highlands.

740 The second settlement phase, which is recorded only by two bone tools of uncertain stratigraphic  
741 positions, indicates Gravettian occupation in Koziarnia Cave simultaneous to a well-known mammoth  
742 butchering site at Spadzista Street in Kraków [74, 109,110]. Interestingly none of the Gravettian  
743 occupation phases in Koziarnia Cave overlap the Gravettian settlement from Mamutowa Cave, which  
744 can be dated to 29-27.5 ky cal. BP.

745

## 746 **Conclusions**

747 The obtained results show the complex stratigraphy in Koziarnia Cave. Although the new fieldwork was  
748 conducted far from the cave entrance, where only scarce settlement traces could be found, detailed  
749 chronostratigraphic and archaeological analyses made possible to determine four general occupation  
750 phases in the cave. We may, therefore, assume that the cave was occupied in the Late Middle  
751 Palaeolithic, but the typo-technological character of the assemblage is still to be discussed. The site was

752 also occupied during the Middle/Upper Palaeolithic transition. This occupation phase can be identified  
753 as Jerzmanowician and should be dated to 39-36 ky cal. BP. The obtained radiocarbon dates indicate  
754 that the Jerzmanowician tradition lasted longer and did not finish with the Campanian Ignimbrite  
755 eruption. Above the Jerzmanowician strata, a thin sterile layer can be observed, separating the overlying  
756 Gravettian strata. The earliest Gravettian occupation can be dated to 35-31 ky cal. BP, and thus  
757 represents the earliest Gravettian occupation in the Polish Jura, and one of the earliest to the North of  
758 Carpathians.

759 One should also emphasize that the recent results confirm the previous assumptions, claiming that  
760 humans and animals did not cohabit caves, even if their traces are found in the same lithostratigraphic  
761 layers. For this reason, only radiocarbon dates obtained either on charcoal fragments or modified bones  
762 or teeth should be used for determining human settlement at cave sites.

763

## 764 Acknowledgements

765 Authors would like to thank Professor Teresa Madeyska, who give access to the archive field  
766 documentation of the site and provided a great support in our research. We would like to thank the  
767 Ojców National Park and the Institute of Geophysics of the Polish Academy of Sciences for their kind  
768 permission for conducting the fieldworks inside the cave. The ZooMS analysis was financed by the Max  
769 Planck Society and we would like to acknowledge Prof. Dr. Stefan Kalkhof and the IZI Fraunhofer  
770 institute of Leipzig for providing us access to a MALDI-TOF-MS.

## 771 References

- 772 1. Hublin JJ, Bailey SE. Revisiting the Last Neanderthals. In: Conrad NJ, editor. *When*  
773 *Neanderthals and Modern Humans Met*. Tübingen: Kerns Verlag; 2006. p. 105-28.
- 774 2. Straus LG. Has the Notion of “Transitions” in Paleolithic Prehistory Outlived Its Usefulness?  
775 The European Record in Wider Context. In: Camps M, Chauhan P, editors. *Sourcebook of*  
776 *Paleolithic Transitions. Methods, Theories, and Interpretations*. London: Springer; 2009. p. 3-  
777 18.
- 778 3. White RK. Rethinking the Middle/Upper Paleolithic transition. *Curr Anthropol*. 1982; 23(2):  
779 169-176.
- 780 4. Allsworth-Jones P. The Szeletian revisited. *Anthropologie*. 2004; 3: 281-96.
- 781 5. Higham T, Douka K, Wood R, Bronk Ramsey C, Brock F, Basell L, et al. The timing and  
782 spatiotemporal patterning of Neanderthal disappearance. *Nature*. 2014; 512: 306-9.
- 783 6. Neruda P, Nerudová Z. The Middle-Upper Palaeolithic transition in Moravia in the context of  
784 the Middle Danube region. *Quat Int*. 2013; 294(C): 3-19.
- 785 7. Tostevin GB. *Seeing Lithics: A Middle-Range Theory for Testing for Cultural Transmission in*  
786 *the Pleistocene*. Cambridge: Oxbow Books; 2013.
- 787 8. Villa P, Pollarolo L, Conforti J, Marra F, Biagioni C, Degano I, et al. From Neandertals to  
788 modern humans: New data on the Uluzzian. *PLoS ONE*. 2018; 13(5): e0196786.  
789 <https://doi.org/10.1371/journal.pone.0196786>
- 790 9. Bobak D, Płonka T, Połtowicz-Bobak M, Wiśniewski A. New chronological data for  
791 Weichselian sites from Poland and their implications for Palaeolithic. *Quat Int*. 2013; 296: 23-  
792 36.
- 793 10. Jöris O, Street M, Terberger T, Weninger B. Radiocarbon Dating the Middle to Upper  
794 Palaeolithic Transition: The Demise of the Last Neanderthals and the First Appearance of  
795 Anatomically Modern Humans in Europe. In: Condemi S, Weniger GC, editors. *Continuity and*  
796 *Discontinuity in the Peopling of Europe: One Hundred Fifty Years of Neanderthal Study:*  
797 *Proceedings of the international congress to commemorate "150 years of Neanderthal*  
798 *discoveries, 1856-2006"*; 2006 Jul 21-6; Bonn, Germany. Dordrecht: Springer; 2011. p. 239-98.
- 799 11. Allsworth-Jones P. *The Szeletian and the Transition from Middle to Upper Palaeolithic in*  
800 *Central Europe*. Oxford: Clarendon Press; 1986.

- 801 12. Hublin JJ. The modern human colonization of western Eurasia: when and where?. *Quat Sci Rev.*  
802 2015; 118: 194-210.
- 803 13. Svoboda JA. Continuities, discontinuities and interactions in Early Upper Paleolithic  
804 technologies. In: Brantingham PJ, Kuhn SL, Kerry KW, editors. *The Early Upper Paleolithic*  
805 *beyond Western Europe.* Berkeley: University of California Press. 2004. p.30-49.
- 806 14. Flas D. The Middle to Upper Paleolithic transition in Northern Europe: the Lincombian-  
807 Ranisian-Jerzmanowician and the issue of acculturation of the last Neanderthals. *World*  
808 *Archaeol.* 2011;43(4):605-27.
- 809 15. Higham TFG, Compton T, Stringer C, Jacobi R, Shapiro B, Trinkaus E, Chandler B, Gröning F,  
810 Collins C, Hillson S, O’Higgins P, FitzGerald C, Fagan M. The earliest evidence for  
811 anatomically modern humans in northwestern Europe. *Nature.* 2011; 479: 521-4.
- 812 16. Hoffecker JF. The spread of modern humans in Europe. *PNAS.* 2009;106(38):16040-5.  
813 <https://doi.org/10.1073/pnas.0903446106>
- 814 17. Svoboda JA. La question szélétienne. In: Cliquet D, editor. *Les industries à outils bifaciaux du*  
815 *Paléolithique moyen d’Europe occidentale.* Actes de la table-ronde internationale organisée à  
816 Caen (Basse-Normandie - France); 1999 Oct 14-15; Caen, France. Liège: Université de Liège,  
817 ERAUL. 2001;98. p. 221-30. French.
- 818 18. Valoch K. More on the question of Neanderthal acculturation in Central Europe. *Curr Anthropol.*  
819 2000; 41(4): 625-626.
- 820 19. Zilhão J. Neandertal-Modern human contact in Western Eurasia: Issues of dating, Taxonomy,  
821 and Cultural Associations. In: Akazawa T, Nishiaki Y, Kenichi A, editors. *Dynamics of Learning*  
822 *in Neanderthals and Modern Humans Vol. 1: Cultural Perspectives, Replacement of*  
823 *Neanderthals by Modern Humans Series.* Japan: Springer; 2013. p. 21-57.
- 824 20. Chmielewski W. *Civilisation de Jerzmanowice.* Wrocław-Warszawa-Kraków: Zakład  
825 Narodowy im. Ossolińskich; 1961. French.
- 826 21. Flas D. Jerzmanowice points from Spy and the issue of the Lincombian-Ranisian-  
827 Jerzmanowician. *Anthropologica et Praehistorica.* 2012; 123(1): 217-30.
- 828 22. Hülle W. Vorläufige Mitteilung über die altsteinzeitliche Fundstelle Ilsehöhle unter Burg Ranis,  
829 Kreis Ziegenrück. In: Andree J, editor. *Der Eiszeitliche Mensch in Deutschland und seine*  
830 *Kulturen.* Stuttgart: F.Enke; 1939, p.105-14. German.
- 831 23. Hülle W. *Die Ilsehöhle unter Burg Ranis in Thüringen.* Stuttgart: Fischer; 1977.
- 832 24. Römer F. Die Knochenhöhlen von Ojcow in Polen. *Palaeontographica.* 1883; 29: 193-233.
- 833 25. Römer F. Bone-caves of Ojcow in Poland. Translated by J.E.Lee, London: Longmans, Green  
834 and CO; 1884.
- 835 26. Chmielewski W. *Prehistoria Ziemi Polskiej.* Wrocław: Zakład Narodowy im. Ossolińskich;  
836 1975. Polish.
- 837 27. Chmielewski W, Kowalski K, Madeyska-Niklewska T, Sych L. Wyniki badań osadów jaskini  
838 Koziarni w Sąsowie pow. Olkusz, *Folia Quat.* 1967; 26. Polish.
- 839 28. Desbrosse R, Kozłowski JK. *Hommes et climats à l’âge du mammouth: Le Paléolithique*  
840 *supérieur d’Eurasie centrale.* Paris: Masson; 1988.
- 841 29. Kozłowski JK, Kozłowski SK, *Le Paléolithique en Pologne.* Grenoble: Jérôme Million; 1996.
- 842 30. Kozłowski JK. La grande plaine de l’Europe avant le Tardiglaciare. *ERAUL.* 2002; 99: 53-65.
- 843 31. Lorenc M. Radiocarbon ages of bones from Vistulian (Weichselian) cave deposits in Poland and  
844 their stratigraphy. *Acta Geol Pol.* 2013; 63(3): 399-424.
- 845 32. Nadachowski A, Lipecki G, Wojtal P, Miękina B. Radiocarbon chronology of woolly mammoth  
846 (*Mammuthus primigenius*) from Poland. *Quat Int.* 2011; 245: 186-92.
- 847 33. Krajcarz MT, Krajcarz M, Ginter B, Goslar T, Wojtal P. Towards a Chronology of the  
848 Jerzmanowician—a New Series of Radiocarbon Dates from Nietoperzowa Cave (Poland).  
849 *Archaeometry.* 2018; 60: 383-401.
- 850 34. Kot M, Gryczewska N, Berto C, Wojenka M, Szeliga M, Jaskulska E, et al. Thirteen cave sites:  
851 Settlement patterns in Sąsów Valley, Polish Jura. *Antiquity.* 2019; 93(371): e30.  
852 doi:10.15184/aqy.2019.155
- 853 35. Kot M, Wojenka M, Szeliga M. Badania wykopaliskowe Stefana Krukowskiego w Dolinie  
854 Sąsowskiej. *Wiadomości Archeologiczne.* 2019; LXX: 51-78. Polish.



- 855 36. Kozłowski SK, Stefan Krukowski. *Narodziny giganta*. Warszawa: Państwowe Muzeum  
856 Archeologiczne, Stowarzyszenie Naukowe Archaeologów Polskich; 2007. Polish.
- 857 37. Greguss P. *Xylotomische Bestimmung der heute lebenden Gymnospermen*. Budapest:  
858 Akadémiai Kiadó; 1955.
- 859 38. Schweingruber FH. *Anatomie Europäischer Hölzer*. Bern-Stuttgart: Paul Haupt Berne und  
860 Stuttgart Publishers; 1990.
- 861 39. Moskal-del Hoyo M, Kozłowski JK. Botanical identification of wood charcoal remains and  
862 radiocarbon dating – new examples of the importance of taxonomical identifications prior to 14C  
863 dating. *Sprawozdania Archeologiczne* 2009; 61: 253-71.
- 864 40. Nowak M, Moskal-del Hoyo M, Mueller-Bieniek A, Lityńska-Zajac M, Kotynia K. Benefits  
865 and weaknesses of radiocarbon dating of plant material as reflected by Neolithic archaeological  
866 sites from Poland, Slovakia and Hungary. *Geochronometria*. 2017; 44: 188-201.
- 867 41. Beresford-Jones DG, Johnson K, Pullen AG, Pryor AJE, Svoboda J, Jones MK. Burning wood  
868 or burning bone? A reconsideration of flotation evidence from Upper Palaeolithic (Gravettian)  
869 sites in the Moravian Corridor. *J Archaeol Sci*. 2010; 37: 2799-811.
- 870 42. Cichocki O, Knibbe B, Tillich I. Archaeological significance of the Palaeolithic charcoal  
871 assemblage from Krems-Wachtberg. *Quat Int*. 2014; 351: 163-71.
- 872 43. Svoboda JA, Hladilova Š, Horaček I, Kaiser J, Králík M, Novák J, et al. Dolní Vestonice IIa:  
873 Gravettian microstratigraphy, environment, and the origin of baked clay production in Moravia.  
874 *Quat Int*. 2015; 359: 195-210.
- 875 44. Alex B, Valde-Nowak P, Regev L, Boaretto E. Late Middle Paleolithic of Southern Poland:  
876 Radiocarbon dates from Ciemna and Obłazowa Caves. *J Archaeol Sci Rep*. 2017; 11: 370-80.
- 877 45. Wilczyński J, Žaár O, Nemergut A, Kufel-Diakowska B, Moskal-del Hoyo M, Morczek P, et al.  
878 The Upper Palaeolithic at Trenčianske Bohuslavice, Western Carpathians, Slovakia. *J Field*  
879 *Archaeol*. Forthcoming 2020.
- 880 46. Goslar T, Czernik J, Goslar E. Low-energy 14C AMS in Poznań Radiocarbon Laboratory,  
881 Poland. *Nucl. Instrum. Methods Phys Res*. 2004; 223: 5-11.
- 882 47. Brock F, Higham T, Ditchfield P, Ramsey CB. Current pretreatment methods for AMS  
883 radiocarbon dating at the Oxford Radiocarbon Accelerator Unit (ORAU). *Radiocarbon*. 2010;  
884 52(1): 103-12.
- 885 48. Reimer PJ, Bard E, Bayliss A, Beck JW, Blackwell PG, Bronk Ramsey C, et al. IntCal13 and  
886 Marine13 radiocarbon age calibration curves 0–50,000 years cal BP. *Radiocarbon*. 2013; 55(4):  
887 1869-87.
- 888 49. Bronk Ramsey, C, Bayesian analysis of radiocarbon dates. *Radiocarbon*. 2009;51(1): 337-360.
- 889 50. Bronk Ramsey, C, Scott, M, van der Plicht, H, Calibration for Archaeological and Environmental  
890 Terrestrial Samples in the Time Range 26-50 ka cal BP. *Radiocarbon* 2013; 55(4): 2021-2027.  
891 DOI: 10.2458/azu\_js\_rc.55.16935
- 892 51. Bronk Ramsey C. Methods for Summarizing Radiocarbon Datasets. *Radiocarbon*. 2017; 59(2):  
893 1809-33.
- 894 52. Wintle AG, Prószyńska H. TL dating of loess in Germany and Poland. *PACT*. 1983; 9: 547-54.
- 895 53. Fedorowicz S, Łanczont M, Bogucki A, Kusiak J, Mroczek P, Adamiec G, et al. Loess-paleosol  
896 sequence at Korshiv (Ukraine) – chronology based on complementary and parallel dating (TL,  
897 OSL), and litho-pedosedimentary analyses. *Quat Int*. 2013; 296: 117-30.
- 898 54. Frechen M. Systematic thermoluminescence dating of two loess profile from the Middle Rhine  
899 Area (F.R.G). *Quat Sci Rev*. 1992; 11: 93-101.
- 900 55. Hellstrom J. Rapid and accurate U/Th dating using parallel ion-counting multicollector ICP-MS.  
901 *J Anal At Spectrom*. 2003; 18: 1346-51.
- 902 56. Baca M, Popović D, Stefaniak K, Marciszak A, Urbanowski M, Nadachowski A, et al. Retreat  
903 and extinction of the Late Pleistocene cave bear (*Ursus spelaeus sensu lato*). *Sci Nat*. 2016;  
904 103(11-12): 92.
- 905 57. Baca M, Mackiewicz P, Stankovic A, Popović D, Stefaniak K, Czarnogórska K, et al. Ancient  
906 DNA and dating of cave bear remains from Niedźwiedzia Cave suggest early appearance of  
907 *Ursus ingressus* in Sudetes. *Quat Int*. 2014; 339-340: 217-23.

- 908 58. Baca M, Stankovic A, Stefaniak K, Marciszak A, Hofreiter M, Nadachowski A, et al. Genetic  
909 analysis of cave bear specimens from Niedźwiedzia Cave, Sudetes, Poland. *Palaeontol Electron.*  
910 2012; 15(2): 21A.
- 911 59. Mackiewicz P, Baca M, Popović D, Socha P, Stefaniak K, Marciszak A, Nadachowski A, et al.  
912 Estimating the extinction time of two cave bears. *Acta Zool Cracov.* 2017; 60(2): 1-14.
- 913 60. Welker F, Hajdinjak M, Talamo S, Jaouen K, Dannemann M, David F, et al. Palaeoproteomic  
914 evidence identifies archaic hominins associated with the Châtelperronian at the Grotte du Renne.  
915 *PNAS* 2016 Oct 4. 2016; 113(40): 11162-7. <https://doi.org/10.1073/pnas.1605834113>
- 916 61. Van Doorn NL, Hollund H, Collins MJ. A novel and non-destructive approach for ZooMS  
917 analysis: Ammonium bicarbonate buffer extraction. *Archaeol Anthropol Sci.* 2011; 3(3): 281-9.
- 918 62. Buckley M, Collins M, Thomas-Oates J, Wilson JC. Species identification by analysis of bone  
919 collagen using matrix-assisted laser desorption/ionisation time-of-flight mass spectrometry.  
920 *Rapid Commun Mass Spectrom.* 2009; 23(23): 3843-54.
- 921 63. Buckley M, Wadsworth C. Proteome degradation in ancient bone: diagenesis and phylogenetic  
922 potential. *Palaeogeogr Palaeoclimatol Palaeoecol.* 2014; 416: 69-79.
- 923 64. Kirby DP, Buckley M, Promise E, Trauger SA, Holdcraft TR. Identification of collagen-based  
924 materials in cultural heritage. *Analyst.* 2013; 138: 4849-58. (doi:10.1039/c3an00925d)
- 925 65. DeNiro MJ. Postmortem preservation and alteration of in vivo bone collagen isotope ratios in  
926 relation to palaeodietary reconstruction. *Nature.* 1985; 317: 806-9.
- 927 66. Ambrose SH. Preparation and characterization of bone and tooth collagen for isotopic analysis.  
928 *J Archaeol Sci.* 1990; 17: 431-51. doi: 10.1016/0305-4403(90)90007-R.
- 929 67. Fischer A, Vemming Hansen P, Rasmussen P. Macro and Micro Wear Traces on Lithic Projectile  
930 Points. Experimental Results and Prehistoric Examples. *J Dan Archaeol.* 1984; 3: 19-46.
- 931 68. Krajcarz MT, Cyrek K, Krajcarz M, Mroczek P, Sudoł M, Szymanek M, et al. Loess in a cave -  
932 Lithostratigraphic and correlative value of loess and loess-like layers in caves from the Kraków-  
933 Częstochowa Upland (Poland). *Quat Int.* 2016; 399: 13-30.
- 934 69. Ralska-Jasiewiczowa M, Latałowa M, Wasylkowa K, Tobolski K., Madeyska E., Wright HE Jr,  
935 et al., editors. Late Glacial and Holocene history of vegetation in Poland based on isopollen  
936 maps. Kraków: W. Szafer Institute of Botany, Polish Academy of Science, Kraków; 2004.
- 937 70. Hercman H, Szczerba M, Zawadzki P, Trojan A. Carbon isotopes in wood combustion/pyrolysis  
938 products: experimental and molecular simulation approaches. *Geochronometria* 2019; 46: 111-  
939 124, DOI 10.1515/geochr-2015-0110
- 940 71. Wojtal P, Wilczyński J, Nadachowski A, Münzel SC. Gravettian hunting and exploitation of  
941 bears in Central Europe. *Quat Int.* 2015; 359-360: 58-71. doi: 10.1016/j.quaint.2014.10.017.
- 942 72. Terlato G, Bocherens H, Romandini M, Nannini N, Hobson KA, Peresani M. Chronological and  
943 Isotopic data support a revision for the timing of cave bear extinction in Mediterranean Europe.  
944 *Hist Biol.* 2019; 31(4): 474-84.
- 945 73. Cooper A, Turney C, Hughen KA, Brook BW, McDonald HG, Bradshaw CJ. Abrupt warming  
946 events drove Late Pleistocene Holarctic megafaunal turnover. *Science.* 2015; 349(6248): 602-6.
- 947 74. Rasmussen SO, Bigler M, Blockley SP, Blunier T, Buchardt SL, Clausen HB, et al. A  
948 stratigraphic framework for abrupt climatic changes during the Last Glacial period based on three  
949 synchronized Greenland ice-core records: refining and extending the INTIMATE event  
950 stratigraphy. *Quat Sci Rev.* 2014; 106: 14-28.
- 951 75. Seierstad IK, Abbott PM, Bigler M, Blunier T, Bourne AJ, Brook E, et al. Consistently dated  
952 records from the Greenland GRIP, GISP2 and NGRIP ice cores for the past 104 ka reveal  
953 regional millennial-scale  $\delta^{18}O$  gradients with possible Heinrich event imprint. *Quat Sci Rev.*  
954 2014; 106: 29-46.
- 955 76. Kowalski S. Wstępne wyniki badań archeologicznych w Jaskini Mamutowej prowadzonych w  
956 latach 1957-1964. *Materiały Archeologiczne.* 1967; 8: 47-54. Polish.
- 957 77. Kowalski K, Kozłowski JK, Krysowska M, Wiktor A. Badania osadów w Puchaczej Skale w  
958 Prądniku Czajowskim, pow. Olkusz. *Folia Quat.* 1965; 20: 1-44. Polish.
- 959 78. Kozłowski L. Starsza Epoka Kamienia w Polsce (Paleolit). Poznań: Poznańskie Towarzystwo  
960 Przyjaciół Nauk Prace Komisji Archeologicznej I(I); 1922. Polish.

- 961 79. Krajcarz MT, Sudoł M, Krajcarz M, Cyrek K. The site of Late Quaternary cave sediments - The  
962 Shelter above the Zegar Cave in Zegarowe Rocks (Częstochowa Upland). *Prz Geolog* 2012; 60:  
963 546-53.
- 964 80. Madeyska-Niklewska T. Górnoplejstocenne osady jaskiń Wyżyny Krakowskiej. *Acta Geol*  
965 *Pol.* 1969; 19(2): 341-92. Polish.
- 966 81. Madeyska T. Stratigraphy of the sediments in the Mamutowa Cave at Wierzchowie near Cracow.  
967 *Folia Quat.* 1992; 63: 35-42.
- 968 82. Lorenc M. Radiocarbon dating of some Late Pleistocene faunal assemblages in caves in Poland.  
969 *Acta Zool Cracov.* 2006; 49A(1-2): 41-61.
- 970 83. Kowalski S. Nowe dane do poznania kultury jermanowickiej w Polsce. *Światowit.* 1969; 30:  
971 177-88. Polish.
- 972 84. Zawisza J. Poszukiwania w Jaskini Mamuta 1877 i 1878. *Wiadomości Archeologiczne.* 1882; 4:  
973 1-16; Polish.
- 974 85. Zawisza J.. Dokończenie poszukiwań w Jaskini Mamuta 1879 r.. *Wiadomości Archeologiczne*  
975 1882; 4: 16-18. Polish.
- 976 86. Kozłowski JK, Sobczyk K. The Upper Palaeolithic Site Krakow-Spadzista Street C2,  
977 Excavations 1980, Warszawa-Kraków: PWN; 1987.
- 978 87. Housley R. Radiocarbon dating. In: Valde-Nowak P, Nadachowski A, Madeyska T, editors.  
979 Obłazowa Cave. Human activity, stratigraphy and palaeoenvironment. Kraków: Instytut  
980 Archeologii i Etnologii PAN. 2003. p. 81-5.
- 981 88. Pettitt P. Radiocarbon age of the Early Aurignacian at Piekary II. In: Sachse-Kozłowska E,  
982 Kozłowski SK, editors. Piekary près de Cracovie (Pologne) complexe de sites Paléolithiques.  
983 Kraków: Polska Akademia Umiejętności; 2004. p. 301.
- 984 89. Arppe L, Karhu JA. Oxygen isotope values of precipitation and the thermal climate in Europe  
985 during the middle to late Weichselian ice age. *Quat Sci Rev.* 2010; 29(9-10): 1263-75.  
986 doi:10.1016/j.quascirev.2010.02.013
- 987 90. Wilczyński J. The Jaksice II site – History of research. In: Wilczyński J, editor. A Gravettian  
988 Site in Southern Poland: Jaksice II; Kraków: Institute of Systematics and Evolution of  
989 Animals. Polish Academy of Sciences; 2015. p. 3-14.
- 990 91. Wilczyński J, Miękina B, Lipecki G, Lõugas L, Marciszak A, Rzebik-Kowalska B, et al. Faunal  
991 remains from Borsuka Cave. An example of local climate variability during Late Pleistocene in  
992 southern Poland. *Acta Zool Cracov.* 2012; 52(2): 131-55.
- 993 92. Wilczyński J, Wojtal P, Sobczyk K.. Spatial organization of the Gravettian mammoth hunters  
994 site - Kraków Spadzista (southern Poland). *J Archaeol Sci.* 2012; 39: 3627-42.
- 995 93. Wilczyński J, Wojtal P, Sobieraj D, Sobczyk K. Kraków Spadzista trench C2 - new research and  
996 interpretations of Gravettian settlement. *Quat Int.* 2015; 359-360: 96-113.
- 997 94. Davies W, White D, Lewis M, Stringer C. Evaluating the transitional mosaic: frameworks of  
998 change from Neanderthals to Homo sapiens in eastern Europe. *Quat Sci Rev.* 2015; 118: 211-  
999 42.
- 1000 95. Wiśniewski A, Płonka T, Jary Z, Lisa L, Traczyk A, Kufel-Diakowska B, et al. The early  
1001 Gravettian in a marginal area: new evidence from SW Poland. *Quat Int.* 2015; 359-360: 131-52.
- 1002 96. Valladas H, Mercier N, Froget L, Joron JL, Reyss J-L, Kaltnecker E, et al. Radiometric dates  
1003 for the Middle Palaeolithic sequence of Piekary. In: Sitlivy V, Zięba A, Sobczyk K, editors.  
1004 Middle and Early Upper Palaeolithic of the Krakow Region Piekary IIa. Brussels: Royal  
1005 Museum of Art and History; 2008, p. 49-56.
- 1006 97. Wojtal P. Zooarchaeological Studies of the Late Pleistocene Sites in Poland. Kraków: Institute  
1007 of Systematics and Evolution of Animals Polish Academy of Sciences; 2007.
- 1008 98. Połtowicz-Bobak M, Bobak D, Badura J, Wacnik A, Cywa K. Les nouvelles données sur le  
1009 Szélétien en Pologne. In: Bodu P, Chehmana L, Klaric L, Mevel L, Soriano S, Teyssandier N,  
1010 editors. Le Paléolithique supérieur ancien de l'Europe du Nord-Ouest: Réflexions et synthèses  
1011 à partir d'un projet collectif de recherche sur le centre et le sud du Bassin parisien – Actes du  
1012 colloque de Sens ; 2009 Apr 15-18 ; Mémoires de la Société préhistorique française. 2013; 56:  
1013 485-96. French.
- 1014 99. Dobosi VT. Bone finds from Istállóskő Cave. *Praehistoria.* 2002; 3: 79-102.

- 1015 100. Hillebrand J. A pleistocaen ősember újabb nyomai hazánkban (Neure Spuren de diluvialen  
1016 Menschen in Ungarn). *Barlangkutató*. 1913; I: 19-52. Hungarian.
- 1017 101. Kaminská L, Kozłowski JK, Svoboda JA. The 2002-2003 excavation in the Dzeravá skala Cave,  
1018 West Slovakia. *Anthropologie* 2004; XLII/3, 311-22.
- 1019 102. Kaminská L, Kozłowski JK, Svoboda JA, editors. *Pleistocene Environments and Archaeology*  
1020 *of the Dzeravá skala Cave, Lesser Carpathians, Slovakia*. Kraków; 2005.
- 1021 103. Markó A. Istállóskő revisited: lithic artefacts and assemblages, sixty years after. *Acta Arch*  
1022 *Hung*. 2015; 66: 6-38.
- 1023 104. Markó A. Istállóskő revisited: the osseous artefacts from the lower layer. *Acta Archaeol Acad*  
1024 *Sci Hungaricae*. 2017; 68(2): 193-218.
- 1025 105. Sachse-Kozłowska E. Polish Aurignacian assemblages. *Folia Quat*. 1978; 50: 1-49.
- 1026 106. Valde-Nowak P, Nadachowski A, Madeyska T, editors. *Oblázowa Cave: Human Activity,*  
1027 *Stratigraphy, and Palaeoenvironment*. Krakow: Institute of Archaeology and Ethnology Polish  
1028 Academy of Sciences; 2003.
- 1029 107. Valladas H, Mercier N, Escutenaire C, Kalicki T, Kozłowski JK, Sitlivy V, et al. The Late  
1030 Middle Palaeolithic Blade Technologies and the Transition to the Upper Palaeolithic in Southern  
1031 Poland: TL Dating Contribution. *Eurasian Prehistory*. 2003; 1(1): 57-82.
- 1032 108. Jacobi R. A collection of Early Upper Palaeolithic artefacts from Beedings, near Pulborough,  
1033 West Sussex and the context of similar finds from British Isles. *Proc Prehis Soc*. 2007; 73: 229-  
1034 325.
- 1035 109. Wojtal P, Sobczyk K. Taphonomy of the Gravettian site – Kraków Spadzista Street (B). In:  
1036 Reumer JWF, De Vos J, Mol D, editors. *Advances in Mammoth Research: Proceedings of the*  
1037 *Second International Mammoth Conference; 1999 May 16-20; Rotterdam, Holandia*. DEINSEA.  
1038 2003; 9: 557-62.
- 1039 110. Wojtal P, Sobczyk K. Man and woolly mammoth at the Kraków Spadzista Street. Street (B)  
1040 taphonomy of the site. *J Archaeol Sci*. 2005; 32: 193-206.

1041

## 1042 **Supplements**

- 1043 **S1 File.** Stratigraphy of trench IX/2017 in Koziarnia.
- 1044 **S2 Table.** Radiocarbon dates used in the probability density models.
- 1045 **S3 Table.** Published radiocarbon dates of Jerzmanowician assemblages.
- 1046 **S4 Table.** Morphometric data of stone artefacts.
- 1047 **S5 File.** Traseological analysis of stone artefacts.
